# **Methylotrophy, alkane-degradation, and pigment production as defining features of the globally distributed yet-uncultured phylum Binatota**

**Chelsea L. Murphy<sup>1</sup>, Peter F. Dunfield<sup>2</sup>, Andriy Sheremet<sup>2</sup>, John R. Spear<sup>3</sup>, Ramunas Stepanauskas<sup>4</sup>, Tanja Woyke<sup>5</sup>, Mostafa S. Elshahed<sup>1</sup>, and Noha H. Youssef<sup>1\*</sup>**

<sup>1</sup> Department of Microbiology and Molecular Genetics, Oklahoma State University, Stillwater, OK, USA, <sup>2</sup> Department of Biological Sciences, University of Calgary, Calgary, AB, Canada, <sup>3</sup> Civil and Environmental Engineering, Colorado School of Mines, Golden, Colorado, USA <sup>4</sup> Bigelow Laboratory for Ocean Sciences, East Boothbay, Maine, USA, and <sup>5</sup> Department of Energy Joint Genome Institute, Berkley, California, USA

**\*Correspondence:** Noha Youssef: [Noha@okstate.edu](mailto:Noha@okstate.edu)

1 **Abstract**

2 The recent leveraging of genome-resolved metagenomics has opened a treasure trove of genomes  
3 from novel uncultured microbial lineages, yet left many clades undescribed. We here present a  
4 global analysis of genomes belonging to the Binatota (UBP10), a globally distributed, yet-  
5 uncharacterized bacterial phylum. All orders in the Binatota encoded the capacity for aerobic  
6 methylotrophy using methanol, methylamine, sulfomethanes, chloromethanes, and potentially  
7 methane as substrates. Methylotrophy in the Binatota was characterized by order-specific  
8 substrate degradation preferences, as well as extensive metabolic versatility, i.e. the utilization of  
9 diverse sets of genes, pathways and combinations to achieve a specific metabolic goal. The  
10 genomes also encoded an arsenal of alkane hydroxylases and monooxygenases, potentially  
11 enabling growth on a wide range of alkanes and fatty acids. Pigmentation is inferred from a  
12 complete pathway for carotenoids (lycopene,  $\beta$  and  $\gamma$  carotenes, xanthins, chlorobactenes, and  
13 spheroidenes) production. Further, the majority of genes involved in bacteriochlorophyll *a*, *c*,  
14 and *d* biosynthesis were identified; although absence of key genes and failure to identify a  
15 photosynthetic reaction center precludes proposing phototrophic capacities. Analysis of 16S  
16 rRNA databases showed Binatota's preferences to terrestrial and freshwater ecosystems,  
17 hydrocarbon-rich habitats, and sponges supporting their suggested potential role in mitigating  
18 methanol and methane emissions, alkanes degradation, and nutritional symbiosis with sponges.  
19 Our results expand the lists of methylotrophic, aerobic alkane degrading, and pigment-producing  
20 lineages. We also highlight the consistent encountering of incomplete biosynthetic pathways and  
21 gene shrapnel in microbial genomes, a phenomenon necessitating careful assessment when  
22 assigning putative functions based on a set-threshold of pathway completion.

23

24 **Introduction**

25 Approaches that directly recover genomes from environmental samples and bypass the hurdle of  
26 cultivation (single-cell genomics and genome-resolved metagenomics) have come of age in the  
27 last decade. The new availability of environmentally sourced genomes, obtained as SAGs (single  
28 amplified genomes) or MAGs (metagenome-assembled genomes) is having a lasting impact on  
29 the field of microbial ecology. Distinct, yet often complementary and intertwined, strategies are  
30 employed for the analysis of the deluge of obtained genomes. Site- or habitat-specific studies  
31 focus on spatiotemporal sampling of a single site or habitat of interest. The obtained genomes are  
32 then analyzed to elucidate how resident taxa mediate substrates turnover and elemental cycling,  
33 examine microbial interactions on the metabolic and cellular levels, and document how the  
34 community responds to natural and anthropogenic changes <sup>1,2,3,4</sup>. Function-based studies focus  
35 on genomes from single or multiple habitats to identify and characterize organisms involved in a  
36 specific process, e.g. cellulose degradation <sup>5</sup> or sulfate-reduction <sup>6</sup>. Phylogeny-oriented  
37 (phylocentric) studies, on the other hand, focus on characterizing genomes belonging to a  
38 specific lineage of interest, with the aim of delineating its pan, core, and dispensable gene  
39 repertoire, documenting the defining metabolic capabilities and physiological preferences for the  
40 entire lineage and encompassed clades <sup>7,8</sup>, understanding the lineage's ecological distribution  
41 and putative roles in various habitats <sup>4,9</sup>, and elucidating genomic basis underpinning niche  
42 specializing patterns <sup>10</sup>. The scope of phylocentric studies could range from the analysis of a  
43 single genome from a single ecosystem <sup>11</sup>, to global sampling and *in-silico* analysis efforts <sup>12,13</sup>.  
44 The feasibility and value of phylocentric strategies have recently been enhanced by the  
45 development of a genome-based (phylogenomic) taxonomic outline based on extractable data  
46 from MAGs and SAGs providing a solid framework for knowledge building and data

47 communication <sup>14</sup>, as well as recent efforts for massive, high-throughput binning of genomes  
48 from global collections of publicly available metagenomes in GenBank nr and Integrated  
49 Microbial Genomes & Microbiomes (IMG/M) databases <sup>15, 16</sup>.

50 Candidate phylum UBP10 has originally been described as one of the novel lineages  
51 recovered from a massive binning effort that reconstructed thousands of genomes from publicly  
52 available metagenomic datasets <sup>15</sup>. UBP10 has subsequently been named candidate phylum  
53 Binatota (henceforth Binatota) in an effort to promote nomenclature for uncultured lineages  
54 based on attributes identified in MAGs and SAGs <sup>17</sup>. The recent generation of 52,515 distinct  
55 MAGs binned from over 10,000 metagenomes <sup>16</sup> has greatly increased the number of available  
56 Binatota genomes. Here, we utilize a phylocentric approach and present a comparative analysis  
57 of the putative metabolic and biosynthetic capacities and putative ecological roles of members of  
58 the candidate phylum Binatota, as based on sequence data from 108 MAGs. Our study  
59 documents aerobic methylotrophy, aerobic alkane degradation, and carotenoid pigmentation as  
60 defining traits in the Binatota. We also highlight the presence of incomplete chlorophyll  
61 biosynthetic pathways in all genomes, and propose several evolutionary-grounded scenarios that  
62 could explain such pattern.

63

64

## Results

65 **Overview.** A total of 108 Binatota MAGs with >70% completion and <10% contamination were  
66 used for this study, which included 86 medium-quality and 22 high-quality genomes, as based on  
67 MIMAG standards<sup>18</sup>. Binatota genomes clustered into seven orders designated as Bin18 (n=2),  
68 Binatales (n=48), HRBin30 (n=7), UBA1149 (n=9), UBA9968 (n=34), UBA12015 (n=1),  
69 UTPRO1 (n=7), encompassing 12 families, and 24 genera (Figure 1, Table S1). 16S rRNA gene  
70 sequences extracted from orders Bin18 and UBA9968 genomes were classified in SILVA  
71 (release 138)<sup>19</sup> as members of class bacteriap25 in the phylum Myxococcota, order Binatales  
72 and order HRBin30 as uncultured phylum RCP2-54, and orders UBA1149 and UTPRO1 as  
73 uncultured Desulfobacterota classes (Table S1). RDP II-classification (July 2017 release,  
74 accessed July 2020) classified all Binatota sequences as unclassified Deltaproteobacteria (Table  
75 S1).

### 76 **Methylotrophy in the Binatota.**

#### 77 ***1. C1 substrates oxidation to formaldehyde.***

78 *Methanol:* With the exception of HRBin30, all orders encoded at least one type of methanol  
79 dehydrogenase (Figure 2a). Three distinct types of methanol dehydrogenases were identified  
80 (Figure 2a, b): 1. The NAD(P)-binding MDO/MNO-type methanol dehydrogenase (*mno*),  
81 typically associated with Gram-positive methylotrophic bacteria (Actinobacteria and *Bacillus*  
82 *methanolicus*)<sup>20</sup>, was the only type of methanol dehydrogenase identified in orders UBA9968,  
83 UBA12105, and UTPRO1 (Figure 2a, Extended data 1), as well as some UBA1149 and Binatales  
84 genomes. 2. The MDH2-type methanol dehydrogenase, previously discovered in members of the  
85 Burkholderiales and Rhodocyclales<sup>21</sup>, was encountered in the majority of order UBA1149  
86 genomes and in two Binatales genomes, and 3. The lanthanide-dependent pyrroloquinoline

87 quinone (PQQ) methanol dehydrogenase XoxF-type was encountered in nine genomes from the  
88 orders Bin18, and Binatales, together with the accessory XoxG (c-type cytochrome) and XoxJ  
89 (periplasmic binding) proteins (Figure 2a). All later genomes also encoded PQQ biosynthesis.  
90 Surprisingly, none of the genomes encoded the MxaF1-type (MDH1) methanol dehydrogenase,  
91 typically encountered in model methylotrophs <sup>22</sup>.

92 *Methylamine*: All Binatota orders except UBA9968 encoded methylamine degradation capacity.  
93 The direct periplasmic route (methylamine dehydrogenase; *mau*) was more common, with *mauA*  
94 and *mauB* enzyme subunits encoded in the Binatales, HRBin30, UBA1149, UBA12105, and  
95 UTPR01 (Figure 2a, Extended data 1). Amicyanin (encoded by *mauC*) is the most probable  
96 electron acceptor for methylamine dehydrogenase <sup>22</sup> (Figure 2a). On the other hand, one Bin18  
97 genome, and two Binatales genomes (that also encode the *mau* cluster) encoded the full  
98 complement of genes for methylamine oxidation via the indirect glutamate pathway (Figure 2a,  
99 Extended data 1).

100 *Methylated sulfur compounds*: Binatota genomes encoded several enzymes involved in the  
101 degradation of dimethyl sulfone, methane sulfonic acid (MSA), and dimethyl sulfide (DMS).  
102 Nine genomes (two Bin18, and 7 Binatales) encoded dimethyl sulfone monooxygenase (*sfnG*)  
103 involved in the degradation of dimethyl sulfone to MSA with the concomitant release of  
104 formaldehyde. Three of these nine genomes also encoded alkane sulfonic acid monooxygenase  
105 (*ssuD*), which will further degrade the MSA to formaldehyde and sulfite. Degradation of DMS  
106 via DMS monooxygenase (*dmoA*) to formaldehyde and sulfide was encountered in 13 genomes  
107 (2 Bin18, 9 Binatales, and 2 UBA9968). Further, one Binatales genome encoded the *dso* system  
108 (EC: 1.14.13.245) for DMS oxidation to dimethyl sulfone, which could be further degraded to  
109 MSA as explained above (Figure 2a, Extended data 1).

110 *Dihalogenated methane*: One Bin18 genome encoded the specific dehalogenase/ glutathione S-  
111 transferase (*dcmA*) capable of converting dichloromethane to formaldehyde.

112 *Methane*: Genes encoding particulate methane monooxygenase (pMMO) were identified in  
113 orders Bin18 (2/2 genomes) and Binatales (9/48 genomes) (Figure 2a, Extended data 1), while  
114 genes encoding soluble methane monooxygenase (sMMO) were not found. A single copy of all  
115 three pMMO subunits (A, B, and C) was encountered in 9 of the 11 genomes, while two copies  
116 were identified in two genomes. pMMO subunit genes (A, B, and C) occurred as a contiguous  
117 unit in all genomes, with a CAB (5 genomes), and/or CAxB or CAxxB (8 genomes, where x is a  
118 hypothetical protein) organization, similar to the pMMO operon structure in methanotrophic  
119 Proteobacteria, Verrucomicrobia, and *Candidatus* Methyloirabilis (NC10)<sup>23, 24, 25, 26</sup> (Figure  
120 2c ). In addition, five of the above eleven genomes also encoded a *pmoD* subunit, recently  
121 suggested to be involved in facilitating the enzyme complex assembly, and/or in electron transfer  
122 to the enzyme's active site<sup>27, 28</sup>. Phylogenetic analysis of Binatota *pmoA* sequences revealed  
123 their affiliation with two distinct clades: the yet-uncultured Cluster 2 TUSC (Tropical Upland  
124 Soil Cluster) methanotrophs<sup>29</sup> (2 Binatales genomes), and a clade encompassing *pmoA*  
125 sequences from Actinobacteria (*Nocardioides* sp. strain CF8, *Mycolicibacterium*, and  
126 *Rhodococcus*) and SAR324 (*Candidatus* Lambdaproteobacteria)<sup>30, 31</sup> (Figure 2d). Previous  
127 studies have linked Cluster 2 TUSC pMMO-harboring organisms to methane oxidation based on  
128 selective enrichment on methane in microcosms derived from Lake Washington sediments<sup>32</sup>. All  
129 Binatota genomes encoding TUSC-affiliated pMMO, also encoded genes for downstream  
130 methanol and formaldehyde oxidation as well as formaldehyde assimilation (see below),  
131 providing further evidence for their putative involvement in methane oxidation. On the other  
132 hand, studies on *Nocardioides* sp. strain CF8 demonstrated its capacity to oxidize short chain

133 (C2-C4) hydrocarbons, but not methane, via its pMMO, and its genome lacked methanol  
134 dehydrogenase homologues<sup>33</sup>. Such data favor a putative short chain hydrocarbon degradation  
135 function for organisms encoding this type of pMMO, although we note that five out of the nine  
136 Binatota genomes encoding SAR324/ Actinobacteria-affiliated *pmoA* sequences also encoded at  
137 least one methanol dehydrogenase homologue. Modeling pMMO subunits from both TUSC-type  
138 and Actinobacteria/SAR324-type Binatota genomes using *Methylococcus capsulatus* (Bath) 3D  
139 model (PDB ID: 3rbg) revealed a heterotrimeric structure ( $\alpha_3\beta_3\gamma_3$ ) with the 7, 2, and 5 alpha  
140 helices of the PmoA, PmoB, and PmoC subunits, respectively, as well as the beta sheets  
141 characteristic of PmoA, and PmoB subunits (Figure 2e). Modeling also predicted binding  
142 pockets of the dinuclear Cu ions and Zn ligands (Figure 2e).

143 **2. Formaldehyde oxidation to CO<sub>2</sub>:** Three different routes for formaldehyde oxidation to  
144 formate were identified (Figure 3). First, the Actinobacteria specific thiol-dependent  
145 formaldehyde dehydrogenase (*fadh/mscR*) (EC: 1.1.1.306) was, surprisingly, detected in the  
146 majority (96 out of 108) of genomes (Figure 3a, Extended data 1). The enzyme requires a  
147 specific thiol (mycothiol<sup>34</sup>), the biosynthesis of which (encoded by *mshABC* gene cluster) was  
148 also encoded in Binatota genomes (Figure 3a). Second, the tetrahydrofolate (H<sub>4</sub>F)-linked  
149 pathway comprising the genes *fold* (encoding bifunctional methylene-H<sub>4</sub>F dehydrogenase and  
150 methenyl-H<sub>4</sub>F cyclohydrolase) and either *ftfL* (the reversible formyl-H<sub>4</sub>F ligase) or *purU* (the  
151 irreversible formyl-H<sub>4</sub>F hydrolase) was also widespread (98/108 genomes). Finally, 40 genomes  
152 (Bin18, Binatales, HRBin30, and UTPR01) also encoded the single gene/enzyme NAD-linked  
153 glutathione-independent formaldehyde dehydrogenase *fdhA*. Surprisingly, no evidence of the  
154 most common formaldehyde oxidation pathway (tetrahydromethanopterin (H<sub>4</sub>MPT)-linked) was  
155 detected in any of the Binatota genomes. The NAD- and glutathione-dependent formaldehyde



156 oxidation pathway was found incomplete: while homologs of formaldehyde dehydrogenase  
157 (*frmA*) were detected in almost all Binatota genomes, S-formylglutathione hydrolase (*frmB*) were  
158 absent. Following formaldehyde oxidation to formate, formate is subsequently oxidized to CO<sub>2</sub>  
159 by one of many formate dehydrogenases. The majority of Binatota genomes (103/108) encoded  
160 at least one copy of the NAD-dependent formate dehydrogenase (EC: 1.17.1.9) (Figure 3a,  
161 Extended data 1).

162 **3. Formaldehyde assimilation.** Two pathways for formaldehyde assimilation by methylotrophs  
163 have been described: the serine cycle, which assimilates 2 formaldehyde molecules and 1 CO<sub>2</sub>  
164 molecule, and the ribulose monophosphate cycle (RuMP), which assimilates 3 formaldehyde and  
165 no CO<sub>2</sub> molecules. In addition, some methylotrophs assimilate carbon at the level of CO<sub>2</sub> via the  
166 Calvin Benson Bassham (CBB) cycle<sup>22</sup>. Homologs encoding the RuMP cycle-specific enzymes  
167 were missing from all Binatota genomes, and only three genomes belonging to the Binatales  
168 order encoded the CBB cycle enzymes phosphoribulokinase and rubisCO. On the other hand,  
169 genes encoding enzymes of the serine cycle (Figure 3b) were identified in all genomes (Figure  
170 3c, Extended data 1), with the key enzymes that synthesize and cleave malyl-CoA (*mtkA/B* [EC  
171 6.2.1.9] malate-CoA ligase, and *mcl* [EC 4.1.3.24] malyl-CoA lyase, respectively) encountered  
172 in 98, and 86 Binatota genomes, respectively (Figure 3c, Extended data 1). The entry point of  
173 CO<sub>2</sub> to the serine cycle is the phosphoenolpyruvate (PEP) carboxylase (*ppc*) step catalyzing the  
174 carboxylation of PEP to oxaloacetate (Figure 3b). Homologues of *ppc* were missing from most  
175 Binatota genomes. Instead, all genomes encoded PEP carboxykinase (*pckA*) that replaces *ppc*  
176 function as shown in methylotrophic mycobacteria<sup>35</sup> (Figure 3b-c, Extended data 1).

177         During the serine cycle, regeneration of glyoxylate from acetyl-CoA is needed to restore  
178 glycine and close the cycle. Glyoxylate regeneration can be realized either through the classic

179 glyoxylate shunt <sup>36</sup>, or the ethylmalonyl-CoA pathway (EMCP) <sup>37</sup> (Figure 3b). All Binatota  
180 genomes exhibited the capacity for glyoxylate regeneration, but the pathway employed appears  
181 to be order-specific. Genes encoding all EMCP pathway enzymes were identified in genomes  
182 belonging to the orders Bin18, Binatales, HRBin30, UBA1149, and UBA12105 (Figure 3c,  
183 Extended data 1), including the two EMCP-specific enzymes ethylmalonyl-CoA mutase (*ecm*)  
184 and crotonyl-CoA reductase/carboxylase (*ccr*). On the other hand, order UBA9968 genomes  
185 lacked EMCP-specific enzymes but encoded the classic glyoxylate shunt enzymes isocitrate  
186 lyase (*aceA*) and malate synthase (*aceB*) (Figure 3c, Extended data 1).

### 187 **Alkane degradation**

188 Besides methylotrophy and methanotrophy, Binatota genomes exhibited extensive short-,  
189 medium-, and long-chain alkanes degradation capabilities. In addition to the putative capacity of  
190 Actinobacteria/SAR324-affiliated pMMO to oxidize C<sub>1</sub>-C<sub>5</sub> alkanes, and C<sub>1</sub>-C<sub>4</sub> alkenes as  
191 described above, some Binatota genomes encoded propane-2-monoxygenase (*prmABC*), an  
192 enzyme mediating propane hydroxylation in the 2-position yielding isopropanol. Several  
193 genomes, also encoded medium chain-specific alkane hydroxylases, e.g. homologues of the  
194 nonheme iron *alkB* <sup>38</sup> and Cyp153-class alkane hydroxylases <sup>39</sup>. The genomes also encoded  
195 multiple long-chain specific alkane monoxygenase, e.g. *ladA* homologues (EC:1.14.14.28) <sup>40</sup>  
196 (Figure 4a, Extended data 1). Finally, Binatota genomes encoded the capacity to metabolize  
197 medium-chain haloalkane substrates. All genomes encoded *dhaA* (haloalkane dehalogenases  
198 [EC:3.8.1.5]) known to have a broad substrate specificity for medium chain length (C3 to C10)  
199 mono-, and dihaloalkanes, resulting in the production of their corresponding primary alcohol,  
200 and haloalcohols, respectively <sup>41</sup> (Figure 4a, Extended data 1).

201 Alcohol and aldehyde dehydrogenases sequentially oxidize the resulting alcohols to their  
202 corresponding fatty acids or fatty acyl-CoA. Binatota genomes encode a plethora of alcohol and  
203 aldehyde dehydrogenases. These include the wide substrate range alcohol (EC:1.1.1.1), and  
204 aldehyde (EC:1.2.1.3) dehydrogenases encoded by the majority of Binatota genomes, as well as  
205 bifunctional alcohol/aldehyde dehydrogenase (EC:1.2.1.10 /1.1.1.1) encoded by a few Binatota  
206 genomes (7 genomes), and some highly specific enzymes, e.g. the short-chain isopropanol  
207 dehydrogenase (EC:1.1.1.80) for converting isopropanol and other secondary alcohols to the  
208 corresponding ketone (20 genomes), and acetone monooxygenase (*acmA*, EC:1.14.13.226) and  
209 methyl acetate hydrolase (*acmB*, EC:3.1.1.114) that will sequentially oxidize acetone to  
210 methanol and acetate (6 genomes) (Figure 4a, Extended data 1).

211 A Complete fatty acid degradation machinery that enables all orders of the Binatota to  
212 degrade short-, medium-, and long-chain fatty acids to acetyl CoA and propionyl-CoA were  
213 identified (Figure 4b, Extended data 1). Acetyl-CoA produced from the beta-oxidation pathway  
214 could be assimilated via the ethylmalonyl CoA pathway (EMCP) or the glyoxylate shunt as  
215 discussed above. Further, two pathways for propionyl-CoA assimilation, generated from the  
216 degradation of odd chain fatty acids, were identified (Figure 4c). Orders Bin18, Binatales,  
217 UBA1149, UBA12105, and UTPR01 all encode enzymes for the methylmalonyl CoA (MMCoA)  
218 pathway that carboxylates propionyl CoA to succinyl-CoA (TCA cycle intermediate) via a  
219 methylmalonyl-CoA intermediate. On the other hand, the majority of order UBA9968 genomes  
220 encode enzymes of the 2-methylcitrate cycle for propionyl-CoA degradation (*prpBCD*) where  
221 propionate is degraded to pyruvate and succinate via a 2-methylcitrate intermediate (Figures 4b-  
222 c, Extended data 1).

## 223 **Electron transport chain**

224 All Binatota genomes encode an aerobic respiratory chain comprising complexes I, II, and IV, as  
225 well as an F-type H<sup>+</sup>-translocating ATP synthase (Figures 5a-b, Extended data 1). Interestingly,  
226 genes encoding complex III (cytochrome bc<sub>1</sub> complex) were sparse in Binatota genomes with  
227 some orders lacking genes encoding all subunits (e.g. HRBin30) and others only encoding the  
228 Fe-S (ISP) and the cytochrome b (*cytB*) but not the cytochrome c<sub>1</sub> (*cytI*) subunit (e.g. Binatales,  
229 UBA1149). Instead, genes encoding an Alternate Complex III (ACIII, encoded by  
230 *actABCDEFGG*) were identified in 76 genomes, with 12 genomes encoding both complete  
231 complexes (in orders Bin 18, UBA9968, and UTPR01). Complex III and ACIII transfer electrons  
232 from reduced quinones (all genomes encode the capability of menaquinone biosynthesis) to  
233 cytochrome c which, in turn, reduces cytochrome c oxidase (complex IV). Homologues of the  
234 electron transfer proteins belonging to cytochrome c families were rare in Binatota genomes,  
235 especially those encoding ACIII (Figure 5a, Extended data 1). However, the recent structure of  
236 ACIII from *Flavobacterium johnsoniae*<sup>42</sup> in a supercomplex with cytochrome c oxidase aa3  
237 suggests that electrons could potentially flow from ACIII to complex IV without the need for  
238 cytochrome c, which might explain the paucity of cytochrome c homologues in ACIII-harboring  
239 genomes.

240 Based on the predicted ETC structure, the flow of electrons under different growth  
241 conditions in the Binatota could be envisaged (Figure 5b). When growing on methane, pMMO  
242 would be coupled to the electron transport chain at complex III level via the quinone pool, where  
243 reduced quinones would act as physiological reductant of the enzyme<sup>43</sup> (Figure 5b). pMMO was  
244 also previously reported to receive electrons donated by NADH<sup>44</sup>. During methanol oxidation by  
245 periplasmic enzymes (e.g. *xoxF*-type methanol dehydrogenases), and methylamine oxidation by  
246 the periplasmic methylamine dehydrogenase (*mauAB*) electrons would be shuttled via their

247 respective C-type cytochrome (*xoxG*, and *mauC*, respectively) to complex IV. In the cytosol,  
248 methanol oxidation via the *mno/mdo*-type or the *mdh2*-type methanol dehydrogenases, as well as  
249 formaldehyde and formate oxidation via the action of cytoplasmic formaldehyde and formate  
250 dehydrogenases would contribute NADH to the aerobic respiratory chain through complex I.  
251 Similarly, when growing heterotrophically on alkanes and/or fatty acids, reducing equivalents in  
252 the form of NAD(P)H, and FADH<sub>2</sub> serve as electron donors for aerobic respiration through  
253 complex I, and II, respectively (Figure 5b).

254 Binatota genomes also encode respiratory O<sub>2</sub>-tolerant H<sub>2</sub>-uptake [NiFe] hydrogenases,  
255 belonging to groups 1c (6 sequences), 1f (22 sequences), 1i (1 sequence), and 1h (4 sequences)  
256 (Figure 5c). In *E. coli*, these membrane-bound periplasmically oriented hydrogenases transfer  
257 electrons (through their cytochrome b subunit) from molecular hydrogen to the quinone pool.  
258 Cytochrome *bd* oxidase (complex IV) then completes this short respiratory electron transport  
259 chain between H<sub>2</sub> and O<sub>2</sub><sup>45</sup>. In *E. coli*, the enzyme functions under anaerobic conditions<sup>46</sup>, and  
260 may function as an O<sub>2</sub>-protecting mechanism<sup>47</sup>. Further, simultaneous oxidation of hydrogen  
261 (via type I respiratory O<sub>2</sub>-tolerant hydrogenases) and methane (via pMMO) has been shown to  
262 occur in methanotrophic Verrucomicrobia to maximize proton-motive force generation and  
263 subsequent ATP production<sup>48</sup>. As well, some of the reduced quinones generated through H<sub>2</sub>  
264 oxidation are thought to provide reducing power for catalysis by pMMO<sup>48</sup> (Figure 5b).

#### 265 **Pigment production genes in the Binatota.**

266 *Carotenoids.* Analysis of the Binatota genomes demonstrated a wide range of hydrocarbon  
267 (carotenes) and oxygenated (xanthophyll) carotenoid biosynthesis capabilities. Carotenoids  
268 biosynthetic machinery in the Binatota included *crtB* for 15-cis-phyotene synthesis from  
269 geranylgeranyl-PP; *crtI*, *crtP*, *crtQ*, and *crtH* for neurosporene and all-*trans* lycopene formation

270 from 15-cis-phytone; *crtY* or *crtL* for gamma- and beta-carotene formation from all-*trans*  
271 lycopene; and a wide range of genes encoding enzymes for the conversion of neurosporene to  
272 spheroidene and 7,8-dihydro  $\beta$ -carotene, as well as the conversion of all-*trans* lycopene to  
273 spirilloxanthin, gamma-carotene to hydroxy-chlorobactene glucoside ester and hydroxy- $\gamma$ -  
274 carotene glucoside ester, and beta carotene to isorenieratene and zeaxanthins (Figures 6a-b,  
275 Extended data 1). Gene distribution pattern (Figure 6a, Extended data 1) predicts that all Binatota  
276 orders are capable of neurosporene and all-*trans* lycopene biosynthesis, and all but the order  
277 HRBin30 are capable of isorenieratene, zeaxanthin,  $\beta$ -carotene and dihydro  $\beta$ -carotene  
278 biosynthesis, and with specialization of order UTPR01 in spirilloxanthin, spheroidene, hydroxy-  
279 chlorobactene, and hydroxy  $\gamma$ -carotene biosynthesis.

280 *Bacteriochlorophylls*. Surprisingly, homologues of multiple genes involved in  
281 bacteriochlorophyll biosynthesis were ubiquitous in Binatota genomes (Figure 7a-c).  
282 Bacteriochlorophyll biosynthesis starts with the formation of chlorophyllide *a* from  
283 protoporphyrin IX (Figure 7b). Within this pathway, genes encoding the first *bchI* (Mg-chelatase  
284 [EC:6.6.1.1]), third *bchE* (magnesium-protoporphyrin IX monomethyl ester cyclase  
285 [EC:1.21.98.3]), and fourth *bchLNB* (3,8-divinyl protochlorophyllide reductase [EC:1.3.7.7])  
286 steps were identified in the Binatota genomes (Figures 7a, 7b, Extended data 1). However,  
287 homologues of genes encoding the second *bchM* (magnesium-protoporphyrin O-  
288 methyltransferase [EC:2.1.1.11]), and the fifth (*bciA* or *bicB* (3,8-divinyl protochlorophyllide *a*  
289 8-vinyl-reductase), or *bchXYZ* (chlorophyllide *a* reductase, EC 1.3.7.15)) steps were absent  
290 (Figure 7a-b). A similar patchy distribution was observed in the pathway for bacteriochlorophyll  
291 *a* (Bchl *a*) formation from chlorophyllide *a* (Figure 7b), where genes encoding *bchXYZ*  
292 (chlorophyllide *a* reductase [EC 1.3.7.15]) and *bchF* (chlorophyllide *a* 3<sup>1</sup>-hydratase [EC

293 4.2.1.165]) were not identified, while genes encoding *bchC* (bacteriochlorophyllide *a*  
294 dehydrogenase [EC 1.1.1.396]), *bchG* (bacteriochlorophyll *a* synthase [EC:2.5.1.133]), and *bchP*  
295 (geranylgeranyl-bacteriochlorophyllide *a* reductase [EC 1.3.1.111]) were present in most  
296 genomes (Figure 7a, Extended data 1). Finally, within the pathway for bacteriochlorophylls *c*  
297 (Bchl *c*) and *d* (Bchl *d*) formation from chlorophyllide *a* (Figure 7b), genes for *bciC*  
298 (chlorophyllide *a* hydrolase [EC:3.1.1.100]), and *bchF* (chlorophyllide *a* 3<sup>1</sup>-hydratase  
299 [EC:4.2.1.165]) or *bchV* (3-vinyl bacteriochlorophyllide hydratase [EC:4.2.1.169]) were not  
300 identified, while genes for *bchR* (bacteriochlorophyllide *d* C-12(1)-methyltransferase  
301 [EC:2.1.1.331]), *bchQ* (bacteriochlorophyllide *d* C-8(2)-methyltransferase [EC:2.1.1.332]), *bchU*  
302 (bacteriochlorophyllide *d* C-20 methyltransferase [EC:2.1.1.333]), and *bchK*  
303 (bacteriochlorophyll *c* synthase [EC:2.5.1.-]) were identified (Figure 7b, Extended data 1).

#### 304 **Ecological distribution of the Binatota.**

305 A total of 1,889 (GenBank nt) and 1,213 (IMG/M) 16S rRNA genes affiliated with the Binatota  
306 orders were identified (Extended data 2 and 3, Figures 8, S1a). Analyzing their environmental  
307 distribution showed preference of Binatota to terrestrial soil habitats (39.5-83.0% of GenBank,  
308 31.7-91.6% of IMG/M 16S rRNA gene sequences in various orders), as well as plant-associated  
309 (particularly rhizosphere) environments; although this could partly be attributed to sampling bias  
310 of these globally distributed and immensely important ecosystems (Figure 8a). On the other  
311 hand, a paucity of Binatota-affiliated sequences was observed in marine settings, with sequences  
312 absent or minimally present for Binatales, HRBin30, UBA9968, and UTPRO1 datasets (Figure  
313 8a). The majority of sequences from marine origin were sediment-associated, being encountered  
314 in hydrothermal vents, deep marine sediments, and coastal sediments, with only the Bin18

315 sequences sampled from IMG/M showing representation in the vast, relatively well-sampled  
316 pelagic waters (Figure 8d).

317         In addition to phylum-wide patterns, order-specific environmental preferences were also  
318 observed. For example, in order Bin18, one of the two available genomes originated from the  
319 Mediterranean sponge *Aplysina aerophoba*. Analysis of the 16S rRNA dataset suggests a notable  
320 association between Bin18 and sponges, with a relatively high host-associated sequences (Figure  
321 8a), the majority of which (58.3% NCBI-nt, 25.0% IMG/M) were recovered from the Porifera  
322 microbiome (Figures 8e, S1f). Bin18-affiliated 16S rRNA gene sequences were identified in a  
323 wide range of sponges from ten genera and five global habitat ranges (the Mediterranean genera  
324 *Ircinia*, *Petrosia*, *Chondrosia*, and *Aplysina*, the Caribbean genera *Agelas*, *Xestospongia*, and  
325 *Aaptos*, the Indo-West Pacific genus *Theonella*, the Pacific Dysideidae family, and the Great  
326 Barrier Reef genus *Rhopaloeides*), suggesting its widespread distribution beyond a single sponge  
327 species. The absolute majority of order Binatales sequences (83.0% NCBI-nt, 91.6% IMG/M)  
328 were of a terrestrial origin (Figures 8a, S1c), in addition to multiple rhizosphere-associated  
329 samples (7.5% NCBI-nt and 2.8% IMG/M, respectively) (Figure 8a, S1f). Notably, a relatively  
330 large proportion of Binatales soil sequences originated either from wetlands (peats, bogs) or  
331 forest soils (Figures 8b, S1c), strongly suggesting the preference of the order Binatales to acidic  
332 and organic/methane-rich terrestrial habitats. This corresponds with the fact that 42 out of 48  
333 Binatales genomes were recovered from soil, 38 of which were from acidic wetland or forest  
334 soils (Figure 1, Table S1). Genomes of UBA9968 were recovered from a wide range of  
335 terrestrial and non-marine aquatic environments, and the observed 16S rRNA gene distribution  
336 enforces their ubiquity in all but marine habitats (Figures 8a, S1b-g). Finally, while genomes  
337 from orders HRBin30, UBA1149 and UTPRO1 were recovered from limited environmental



338 settings (thermal springs for HRBin30, gaseous hydrocarbon impacted habitats, e.g. marine  
339 hydrothermal vents and gas-saturated Lake Kivu for UBA1149, and soil and hydrothermal  
340 environments for UTPRO1) (Figure 1, Table S1), 16S rRNA gene analysis suggested their  
341 presence in a wide range of environments from each macro-scale environment classification  
342 (Figures 8a, S1b-g).

343  
344  
345  
346  
347  
348  
349  
350  
351  
352  
353  
354  
355  
356  
357  
358  
359  
360  
361  
362  
363  
364  
365

## Discussion

**Expanding the world of methylootrophy.** The current study expands the list of lineages potentially capable of methylootrophy. An extensive repertoire of genes and pathways mediating the oxidation of multiple C1 compounds to formaldehyde (Figure 2, 9), formaldehyde oxidation to CO<sub>2</sub> (Figure 3a), as well as formaldehyde assimilation pathways (Figure 3c) were identified, indicating that such capacity is a defining metabolic trait in the Binatota. A certain degree of order-level substrate preference was observed, with potential utilization of methanol in all orders except HRBin30, methylamine in all orders except UBA9968, S-containing C1 compound in Bin18, Binatales, and UBA9968, halogenated methane in Bin18, and possible methane utilization (methanotrophy) in Bin18 and Binatales (Figure 2a).

Aerobic methylootrophy has been documented in members of the alpha, beta, and gamma Proteobacteria<sup>49</sup>, Bacteroidetes<sup>50</sup>, Actinobacteria (e.g. genera *Arthrobacter* and *Mycobacterium*), Firmicutes (e.g. *Bacillus methanolicus*)<sup>51</sup>, Verrucomicrobia<sup>52</sup>, and *Candidatus Methyloirabilis* (NC10)<sup>53</sup>. Further, studies employing genome-resolved metagenomics identified some signatures of methylootrophy, e.g. methanol oxidation<sup>10,54</sup>, formaldehyde oxidation/ assimilation<sup>55</sup>, and methylamine oxidation<sup>10</sup>, in the Gemmatimonadetes, Rokubacteria, Chloroflexi, Actinobacteria, Acidobacteria, and Lambdaproteobacteria. The possible contribution of Binatota to methane oxidation (methanotrophy) is especially notable, given the global magnitude of methane emissions<sup>56</sup>, and the relatively narrower range of organisms (Proteobacteria, Verrucomicrobia, and *Candidatus Methyloirabilota* (NC10))<sup>57</sup> capable of this special type of methylootrophy. As described above, indirect evidence exists for the involvement of Binatota harboring TUSC-type pMMO sequences in methane oxidation, while it is currently uncertain whether Binatota harboring SAR324/Actinobacteria-type pMMO

366 sequences are involved in oxidation of methane, gaseous alkanes, or both. pMMO of  
367 methanotrophs is also capable of oxidizing ammonia to hydroxylamine, which necessitates  
368 methanotrophs to employ hydroxylamine detoxification mechanisms<sup>58</sup>. All eleven Binatota  
369 genomes encoding pMMO also encoded at least one homologue of *nir*, *nor*, and/or *nos* genes  
370 that could potentially convert harmful N-oxide byproducts to dinitrogen.

371 As previously noted<sup>22</sup>, methylotrophy requires the possession of three metabolic  
372 modules: C1 oxidation to formaldehyde, formaldehyde oxidation to CO<sub>2</sub>, and formaldehyde  
373 assimilation. Within the world of methylotrophs, a wide array of functionally redundant  
374 enzymes/pathways has been characterized that mediates various reactions/ transformations in  
375 such modules. In addition, multiple combinations of different modules have been observed in  
376 methylotrophs, with significant variations existing even in phylogenetically related organisms.  
377 Our analysis demonstrates that such metabolic versatility indeed occurs within Binatota's  
378 methylotrophic modules. While few phylum-wide characteristics emerged, e.g. utilization of  
379 serine pathway for formaldehyde assimilation, absence of H<sub>4</sub>MPT-linked formaldehyde  
380 oxidation, and potential utilization of PEP carboxykinase (*pckA*) rather than PEP carboxylase  
381 (*ppc*) for CO<sub>2</sub> entry to the serine cycle, multiple order-specific differences were observed, e.g.  
382 XoxF-type methanol dehydrogenase encoded by Bin18 and Binatales genomes, MDH2-type  
383 methanol dehydrogenase encoded by UBA1149 genomes, absence of methanol dehydrogenase  
384 homologues in HRBin30 genomes, absence of methylamine oxidation in order UBA9968, and  
385 potential utilization of the ethylmalonyl-CoA pathway for glyoxylate regeneration by the  
386 majority of the orders versus the glyoxylate shunt by UBA9968.

387 **Alkane degradation in the Binatota.** A second defining feature of the phylum Binatota, besides  
388 methylotrophy, is the widespread capacity for aerobic alkane degradation, as evident by the

389 extensive arsenal of genes mediating aerobic degradation of short- (pMMO, propane  
390 monooxygenase), medium- (*alkB*, *cyp153*), and long-chain alkanes (*ladA*) identified (Figure 4a),  
391 in addition to complete pathways for odd- and even-numbered fatty acids oxidation (Figure 4b).  
392 Hydrocarbons, including alkanes, have been an integral part of the earth biosphere for eons, and  
393 a fraction of microorganisms has evolved specific mechanisms (O<sub>2</sub>-dependent hydroxylases and  
394 monooxygenases, anaerobic addition of fumarate) for their activation and conversion to central  
395 metabolites <sup>59</sup>. Aerobic alkane degradation capacity has so far been encountered in the  
396 Actinobacteria, Proteobacteria, Firmicutes, Bacteroidetes, as well as in a few Cyanobacteria <sup>59</sup>.  
397 As such, this study adds to the expanding list of phyla capable of aerobic alkane degradation.  
398 **Metabolic traits explaining niche preferences in the Binatota.** Analysis of 16S rRNA gene  
399 datasets indicated that the Binatota display phylum-wide (preference to terrestrial habitats and  
400 methane/hydrocarbon-impacted habitats, and rarity in pelagic marine environments), as well as  
401 order-specific (Bin18 in sponges, HRBin30 and UBA1149 in geothermal settings, Binatales in  
402 peats, bogs, and forest soils) habitat preferences (Figures 8, S1). Such distribution patterns could  
403 best be understood in light of the phylum's predicted metabolic capabilities. Soils represent an  
404 important source of methane, generated through microoxic and anoxic niches within soil's  
405 complex architecture <sup>60</sup>. Methane emission from soil is especially prevalent in peatlands, bogs,  
406 and wetlands, where incomplete aeration and net carbon deposition occurs. Indeed, anaerobic <sup>61</sup>,  
407 fluctuating <sup>62</sup>, and even oxic <sup>63</sup> wetlands represent one of the largest sources of methane  
408 emissions to the atmosphere. As well, terrestrial ecosystems represent a major source of global  
409 methanol emissions <sup>64</sup>, with its release mostly mediated by demethylation reactions associated  
410 with pectin and other plant polysaccharides degradation. C1-metabolizing microorganisms  
411 significantly mitigate methane and methanol release to the atmosphere from terrestrial

412 ecosystems<sup>65</sup>, and we posit that members of the Binatota identified in soils, rhizosphere, and  
413 wetlands contribute to such process. The special preference of order Binatales to acidic peats,  
414 bogs, forests, and wetlands could reflect a moderate acidophilic specialization for this order and  
415 suggest their contribution to the process in these habitats.

416         Within the phylum Binatota, it appears that orders HRBin30 and UBA1149 are abundant  
417 in thermal vents, thermal springs, and thermal soils, suggesting a specialization to high  
418 temperature habitats (Figure 8). Binatota's presence in such habitats could be attributed to high  
419 concentrations of alkanes typically encountered in such habitats. Hydrothermal vents display  
420 steep gradients of oxygen in their vicinity, emission of high levels of methane and other gaseous  
421 alkanes, as well as thermogenic generation of medium-and long-chain alkanes<sup>66</sup>. Indeed, the  
422 presence and activity of aerobic hydrocarbon degraders in the vicinity of hydrothermal vents  
423 have been well established<sup>30, 31, 67</sup>.

424         The recovery of Binatota genomes from certain lakes could be a reflection of the high  
425 gaseous load in such lakes. Multiple genomes and a large number of Binatota-affiliated 16S  
426 rRNA sequences were binned/identified from Lake Kivu, a meromictic lake characterized by  
427 unusually high concentrations of methane<sup>68</sup>. Biotically, methane evolving from Lake Kivu is  
428 primarily oxidized by aerobic methanotrophs in surface waters<sup>68, 69, 70</sup>, and members of the  
429 Binatota could contribute to this process. Binatota genomes were also recovered from Lake  
430 Washington sediments, a location that has long served as a model for studying methylotrophy<sup>71</sup>,  
431<sup>72</sup>. Steep counter gradients of methane and oxygen occurring in the Lake's sediments enable  
432 aerobic methanotrophy to play a major role in controlling methane flux through the water  
433 column<sup>73, 74, 75, 76</sup>.

434 Finally, the occurrence and apparent wide distribution of members of the Binatota in  
435 sponges, particularly by the order Bin18, is notable, and could be attributed to the recognized  
436 nutritional-based symbiosis between sponges and hydrocarbon-degraders <sup>77,78</sup>, including  
437 methanotrophs <sup>79</sup>. This is especially true in deep-water sponges, where low levels of planktonic  
438 biomass restrict the amount of food readily acquired via filter feeding and hence biomass  
439 acquisition via methane and alkane oxidation is especially valuable.

440 **Carotenoid pigmentation: occurrence and significance.** The third defining feature of the  
441 Binatota, in addition to aerobic methylotrophy and alkane degradation, is the predicted capacity  
442 for carotenoid production. In photosynthetic organisms, carotenoids increase the efficiency of  
443 photosynthesis by absorbing in the blue-green region then transferring the absorbed energy to the  
444 light-harvesting pigments <sup>80</sup>. Carotenoid production also occurs in a wide range of non-  
445 photosynthetic bacteria belonging to the Alpha-, Beta, and Gamma-Proteobacteria (including  
446 methano- and methylotrophs <sup>81</sup>), Bacteroidetes <sup>82</sup>, Deinococcus <sup>83</sup>, Thermus <sup>84</sup>, Delta-  
447 Proteobacteria <sup>85</sup>, Firmicutes <sup>86</sup>, Actinobacteria <sup>87</sup>, Planctomycetes <sup>88</sup>, and Archaea, e.g.  
448 Halobacteriaceae <sup>89</sup>, and *Sulfolobus* <sup>90</sup>. Here, carotenoids could serve as antioxidants <sup>91</sup>, and aid  
449 in radiation, UV, and desiccation resistance <sup>92,93</sup>. The link between carotenoid pigmentation and  
450 methylo/methanotrophy has long been observed <sup>94</sup>, with the majority of known model Alpha-  
451 and Gamma-Proteobacteria methano- and methylotrophs being carotenoid producers, although  
452 several Gram-positive methylotrophs (*Mycobacterium*, *Arthrobacter*, and *Bacillus*) are not  
453 pigmented. Indeed, root-associated facultative methylotrophs of the genus *Methylobacterium*  
454 have traditionally been referred to as “pink pigmented facultative methylotrophs” and are seen as  
455 integral part of root ecosystems <sup>95</sup>. The exact reason for this correlation is currently unclear and  
456 could be related to the soil environment where they are prevalent, where periodic dryness and

457 desiccation could occur, or to the continuous exposure of these aerobes in some habitats to light  
458 (e.g. in shallow sediments), necessitating protection from UV exposure.

459 **Chlorophyll biosynthesis genes in the Binatota.** Perhaps the most intriguing finding in this  
460 study is the identification of the majority of genes required for the biosynthesis of  
461 bacteriochlorophylls from protoporphyrin-IX (six out of ten genes for bacteriochlorophyll *a* and  
462 seven out of eleven genes for bacteriochlorophyll *c* and *d*). While such pattern is tempting to  
463 propose phototrophic capacities in the Binatota based on the common practice of using a certain  
464 percentage completion threshold to denote pathway occurrence in some studies (e.g. <sup>2</sup>), the  
465 consistent absence of critical genes (*bchM* methyltransferase, *bciA/bciB/bchXYZ* reductases, *bciC*  
466 hydrolase, and *bchF/V* hydratases), coupled with our inability to detect reaction center-encoding  
467 genes, prevents such a proclamation. Identification of a single or few gene shrapnel from the  
468 chlorophyll biosynthesis pathway in microbial genomes is not unique. Indeed, searching the  
469 functionally annotated bacterial tree of life AnnoTree <sup>96</sup> using single KEGG orthologies  
470 implicated in chlorophyll biosynthesis identifies multiple (in some cases thousands) hits in  
471 genomes from non-photosynthetic organisms (Figure 7c). This is consistent with the  
472 identification of a *bchG* gene in a Bathyarchaeota fosmid clone <sup>97</sup>, and, more recently, a few  
473 bacteriochlorophyll synthesis genes in an Asgard genome <sup>98</sup>. However, it should be noted that the  
474 high proportion of genes in the bacteriochlorophyll biosynthetic pathway identified in the  
475 Binatota genomes has never previously been encountered in non-photosynthetic microbial  
476 genomes. Indeed, a search in AnnoTree for the combined occurrence of all seven  
477 bacteriochlorophyll synthesis genes identified in Binatota genomes yielded only photosynthetic  
478 organisms.

479           Accordingly, we put forward three scenarios to explain the proposed relationship between  
480 Binatota and phototrophy: The most plausible scenario, in our opinion, is that members of the  
481 Binatota are pigmented non-photosynthetic organisms capable of carotenoid production, but  
482 incapable of chlorophyll production and lack a photosynthetic reaction center. Under this  
483 scenario, the incomplete pathway for bacteriochlorophyll biosynthesis represents a pattern of  
484 gene loss from a chlorophyll-producing ancestor. The assumption that a lineage has lost the  
485 immensely beneficial capacity to harvest energy from light might appear counterintuitive, even  
486 implausible. However, this could be understood in the context of the proposed role of  
487 chlorophyll during the early evolution of photosynthesis. In a thought-provoking review, Martin  
488 et al.<sup>99</sup> argue that the evolution of chlorophyll-based biosynthesis occurred against a backdrop of  
489 chemolithotrophy in hydrothermal vents, with hydrogen produced abundantly by serpentinization  
490 as the main source of energy, and CO<sub>2</sub> fixation via the acetyl CoA pathway as the main source of  
491 carbon. The acetyl-CoA pathway requires electron transfer to an acceptor, ferredoxin, with an  
492 extremely negative midpoint potential, which could only be achieved via electron bifurcation  
493 reactions. Within such chemolithotrophic, dim-lit hydrogen-dominated realm, the main benefit of  
494 chlorophyll-based anoxygenic photosynthesis would be harvesting the relatively limited amount  
495 of thermal light emitted from hydrothermal vents<sup>100</sup> to allow access to a new source of  
496 moderately low-potential electrons (H<sub>2</sub>S as opposed to H<sub>2</sub>) that could be used together with light  
497 energy to generate reduced ferredoxin for the purpose of CO<sub>2</sub> fixation via the ferredoxin-  
498 dependent acetyl-CoA pathway. The need for such function in a microorganism would be  
499 alleviated with the development of heterotrophic capacities and acquisition of additional  
500 pathways for energy production, allowing for the loss of the non-utilized chlorophyll synthesis  
501 pathway.



502           The second scenario posits that members of the Binatota are indeed phototrophs,  
503   possessing a complete pathway for chlorophyll biosynthesis and a novel type of reaction center  
504   that is bioinformatically unrecognizable. A minimal photosynthetic electron transport chain,  
505   similar to *Chloroflexus aurantiacus*<sup>101</sup>, with the yet-unidentified reaction center, quinone,  
506   alternate complex III (or complex III) and some type of cytochrome c would possibly be  
507   functional. Under such scenario, members of the Binatota would be an extremely versatile  
508   photoheterotrophic facultative methylotrophic lineage. While such versatility, especially  
509   coupling methylotrophy to phototrophy, is rare<sup>102</sup>, it has previously been observed in some  
510   Rhodospirillaceae species<sup>103</sup>. A third scenario is that Binatota are capable of chlorophyll  
511   production, but still incapable of conducting photosynthesis. Under this scenario, genes missed  
512   in the pathway are due to shortcomings associated with *in-silico* prediction and conservative  
513   gene annotation. For example, the missing *bchM* (E.C.2.1.1.11) could possibly be encoded for by  
514   general methyltransferases (EC: 2.1.1.-), the missing *bciC* (EC:3.1.1.100) could possibly be  
515   encoded for by general hydrolases (EC: 3.1.1.-), while the missing *bchF* (EC:4.2.1.165) or *bchV*  
516   (EC:4.2.1.169) could possibly be encoded for by general hydratases (EC: 4.2.1.-).

517           Encountering incomplete pathways in genomes of uncultured lineages is an exceedingly  
518   common occurrence in SAG and MAG analysis<sup>104, 105</sup>. In many cases, this could plausibly  
519   indicate an incomplete contribution to a specific biogeochemical process, e.g. incomplete  
520   denitrification of nitrate to nitrite but not ammonia<sup>105</sup>, or reduction of sulfite, but not sulfate, to  
521   sulfide<sup>106</sup>, provided the thermodynamic feasibility of the proposed partial pathway, and,  
522   preferably, prior precedence in pure cultures. In other cases, a pattern of absence of peripheral  
523   steps could demonstrate the capability for synthesis of a common precursor, e.g., synthesis of  
524   precorrin-2 from uroporphyrinogen, but lack of the peripheral pathway for corrin ring

525 biosynthesis leading to an auxotrophy for vitamin B12. Such auxotrophies are common in the  
526 microbial world and could be alleviated by nutrient uptake from the outside environment <sup>107</sup> or  
527 engagement in a symbiotic lifestyle <sup>108</sup>. However, arguments for metabolic interdependencies,  
528 syntrophy, or auxotrophy could not be invoked to explain the consistent absence of specific  
529 genes in a dedicated pathway, such as bacteriochlorophyll biosynthesis, especially when  
530 analyzing a large number of genomes from multiple habitats. As such, we here raise awareness  
531 that using a certain occurrence threshold to judge a pathway's putative functionality could lead to  
532 misinterpretations of organismal metabolic capacities due to the frequent occurrence of partial,  
533 non-functional, pathways and “gene shrapnel” in microbial genomes.

534 In conclusion, our work provides a comprehensive assessment of the yet-uncultured  
535 phylum Binatota, and highlights its aerobic methylotrophic and alkane degradation capacities, as  
536 well as its carotenoid production, and abundance of bacteriochlorophyll synthesis genes in its  
537 genomes. We also propose a role for this lineage in mitigating methane and methanol emissions  
538 from terrestrial and freshwater ecosystems, alkanes degradation in hydrocarbon-rich habitats, and  
539 nutritional symbiosis with marine sponges. We present specific scenarios that could explain the  
540 unique pattern of chlorophyll biosynthesis gene occurrence, and stress the importance of detailed  
541 analysis of pathways completion patterns for appropriate functional assignments in genomes of  
542 uncultured taxa.

543

544

## Materials and Methods:

545 **Genomes.** All genomes classified as belonging to the Binatota in the GTDB database (n=22  
546 MAGs, April 2020) were downloaded as assemblies from NCBI. In addition, 128 metagenome-  
547 assembled genomes with the classification “Bacteria;UBP10” were downloaded from the  
548 IMG/M database (April 2020). These genomes were recently assembled from public  
549 metagenomes as part of a wider effort to generate a genomic catalogue of Earth’s microbiome <sup>16</sup>.  
550 Finally, 6 metagenome-assembled genomes were obtained as part of the Microbial Dark Matter  
551 MDM-II project. CheckM <sup>109</sup> was utilized for estimation of genome completeness, strain  
552 heterogeneity, and genome contamination. Only genomes with >70% completion and <10%  
553 contamination (n=108) were retained for further analysis (Tables S1, S2). MAGs were classified  
554 as high-, or medium-quality drafts based on the criteria set forth by <sup>18</sup>.

555 **Phylogenetic analysis.** Taxonomic classifications followed the Genome Taxonomy Database  
556 (GTDB) release r89 <sup>14, 110</sup>, and were carried out using the classify\_workflow in GTDB-Tk <sup>111</sup>  
557 (v1.1.0). Phylogenomic analysis utilized the concatenated alignment of a set of 120 single-copy  
558 marker genes <sup>14, 110</sup> generated by the GTDB-Tk. Maximum-likelihood phylogenomic tree was  
559 constructed in RAxML <sup>112</sup> (with a cultured representative of the phylum Deferrisomatota as the  
560 outgroup). SSU rRNA gene-based phylogenetic analysis was also conducted using 16S rRNA  
561 gene sequences extracted from genomes using RNAmmer <sup>113</sup>. Putative taxonomic ranks were  
562 deduced using average amino acid identity (AAI; calculated using AAI calculator [<http://enve-omics.ce.gatech.edu/>]), with the arbitrary cutoffs 56%, and 68% for family, and genus,  
563  
564 respectively.

565 **Annotation.** Protein-coding genes in genomic bins were predicted using Prodigal <sup>114</sup>. For initial  
566 prediction of function, pangenomes were constructed for each order in the phylum Binatota

567 separately using PIRATE <sup>115</sup> with percent identity thresholds of [40, 45, 50, 55, 60, 65, 70, 75,  
568 80, 90], a cd-hit step size of 1, and cd-hit lowest percent id of 90. The longest sequence for each  
569 PIRATE-identified allele was chosen as a representative and assembled into a pangenome. These  
570 pangenomes were utilized to gain preliminary insights on the metabolic capacities and structural  
571 features of different orders. BlastKOALA <sup>116</sup> was used to assign protein-coding genes in each of  
572 the pangenomes constructed to KEGG orthologies (KO), which were subsequently visualized  
573 using KEGG mapper <sup>117</sup>. Analysis of specific capabilities and functions of interest was  
574 conducted on individual genomic bins by building and scanning hidden markov model (HMM)  
575 profiles. All predicted protein-coding genes in individual genomes were searched against  
576 custom-built HMM profiles for genes encoding C1, alkanes, and fatty acids metabolism, C1  
577 assimilation, [NiFe] hydrogenases, electron transport chain complexes, and carotenoid and  
578 chlorophyll biosynthesis. To build the HMM profiles, Uniprot reference sequences for all genes  
579 with an assigned KO number were downloaded, aligned using Clustal-omega <sup>118</sup>, and the  
580 alignment was used to build an HMM profile using hmmbuild (HMMER 3.1b2). For genes not  
581 assigned a KO number (e.g. alternative complex III genes, different classes of cytochrome c  
582 family, cytochrome P450 medium-chain alkane hydroxylase cyp153, methanol dehydrogenase  
583 MNO/MDO family), a representative protein was compared against the KEGG Genes database  
584 using Blastp and significant hits (those with e-values < e-80) were downloaded and used to build  
585 HMM profiles as explained above. The custom-built HMM profiles were then used to scan the  
586 analyzed genomes for significant hits using hmmscan (HMMER 3.1b2) with the option -T 100 to  
587 limit the results to only those profiles with an alignment score of at least 100. Further  
588 confirmation was achieved through phylogenetic assessment and tree building procedures, in  
589 which potential candidates identified by hmmscan were aligned to the reference sequences used

590 to build the custom HMM profiles using Clustal-omega <sup>118</sup>, followed by maximum likelihood  
591 phylogenetic tree construction using FastTree <sup>119</sup>. Only candidates clustering with reference  
592 sequences were deemed true hits and were assigned to the corresponding KO.

593 ***Search for photosynthetic reaction center.*** Identification of genes involved in chlorophyll  
594 biosynthesis in Binatota genomes prompted us to search the genomes for photosynthetic reaction  
595 center genes. HMM profiles for Reaction Center Type 1 (RC1; PsaAB), and Reaction Center  
596 Type 2 (RC2; PufLM and PsbD<sub>1</sub>D<sub>2</sub>) were obtained from the pfam database (pfam00223 and  
597 pfam00124, respectively). Additionally, HMM profiles were built for PscABCD (Chlorobia-  
598 specific), PshA/B (Heliobacteria-specific) <sup>120</sup>, as well as the newly identified Psa-like genes from  
599 Chloroflexota <sup>121</sup>. The HMM profiles were used to search Binatota genomes for potential hits  
600 using hmmscan. To guard against overlooking a distantly related reaction center, we relaxed our  
601 homology criteria (by not including -T or -E options during the hmmscan). An additional search  
602 using a structurally-informed reaction center alignment <sup>120, 122</sup> was also performed. The best  
603 potential hits were modeled using the SWISS-MODEL homology modeler <sup>123</sup> to check for  
604 veracity. Since the core subunits of Type 1 RC proteins are predicted to have 11 transmembrane  
605  $\alpha$ -helices <sup>124, 125</sup>, while type 2 RC are known to contain five transmembrane helices <sup>124, 126</sup>, we  
606 also searched for all predicted proteins harboring either 5 or 11 transmembrane domains using  
607 TMHMM <sup>127</sup>. All identified 5- or 11-helix-containing protein-coding sequences were searched  
608 against GenBank protein nr database to identify and exclude all sequences with a predicted  
609 function. All remaining 5- or 11-helix-containing proteins with no predicted function were then  
610 submitted to SWISS-MODEL homology modeler using the automated mode to predict  
611 homology models.

612 **Classification of [NiFe] hydrogenase sequences.** All sequences identified as belonging to the  
613 respiratory O<sub>2</sub>-tolerant H<sub>2</sub>-uptake [NiFe] hydrogenase large subunit (HyaA) were classified using  
614 the HydDB web tool <sup>128</sup>.

615 **Particulate methane monooxygenase 3D model prediction and visualization.** SWISS-MODEL  
616 <sup>123</sup> was used to construct pairwise sequence alignments of predicted Binatota particulate methane  
617 monooxygenase with templates from *Methylococcus capsulatus* str. Bath (pdb: 3RGB), and for  
618 predicting tertiary structure models. Predicted models were superimposed on the template  
619 enzyme in PyMol (Version 2.0 Schrödinger, LLC).

620 **Ecological distribution of Binatota.** We queried 16S rRNA sequence databases using  
621 representative 16S rRNA gene sequences from six out of the seven Binatota orders (order  
622 UBA12015 genome assembly did not contain a 16S rRNA gene). Two databases were searched:  
623 1. GenBank nucleotide (nt) database (accessed in July 2020) using a minimum identity threshold  
624 of 90%, ≥80% subject length alignment for near full-length query sequences or ≥80% query  
625 length for non-full-length query sequences, and a minimum alignment length of 100 bp, and 2.  
626 The IMG/M 16S rRNA public assembled metagenomes <sup>129</sup> using a cutoff e-value of 1e<sup>-10</sup>,  
627 percentage similarity ≥ 90%, and either ≥80% subject length for full-length query sequences or  
628 ≥80% query length for non-full-length query sequences. Hits satisfying the above criteria were  
629 further trimmed after alignment to the reference sequences from each order using Clustal-omega  
630 and inserted into maximum likelihood phylogenetic trees in FastTree (v 2.1.10, default settings).  
631 The ecological distribution for each of the Binatota orders was then deduced from the  
632 environmental sources of their hits. All environmental sources were classified according to the  
633 GOLD ecosystem classification scheme <sup>130</sup>.

634 **Data availability.** Genomic bins, predicted proteins, and extended data for Figures 2-7 and for

635 Figures 8 and S1a are available at <https://github.com/ChelseaMurphy/Binatota>. Maximum

636 likelihood trees (Figure 1 and Figure S1a) can be accessed at:

637 <https://itol.embl.de/shared/1WgxEjrQfEYWk>. Maximum likelihood trees for chlorophyll

638 biosynthesis genes are available at <https://itol.embl.de/shared/34y3BUHcQd7Lh>.

639

640 **Acknowledgements.** This work has been supported by NSF grants 2016423 (to NHY and MSE),

641 1441717 and 1826734 (to RS). We thank Dr. Kevin Redding (Arizona State University) for

642 helpful discussions. Work conducted by the U.S. Department of Energy Joint Genome Institute,

643 a DOE Office of Science User Facility, is supported under Contract No. DE-AC02-05CH11231.

644 J.R.S. is supported by NASA Astrobiology Rock Powered Life and was granted U.S. Forest

645 Service permit #MLD15053 to conduct field work on Cone Pool and the Little Hot Creek,

646 Mammoth Lakes, California. Thanks to students and participants of the 2014 – 2016

647 International Geobiology Course for research works on Cone Pool.

648 **Figure legends:**

649 **Figure 1.** Phylogenomic relationship between analyzed Binatota genomes. The Maximum  
650 Likelihood tree was constructed in RAxML from a concatenated alignment of 120 single-copy  
651 marker genes. The tree was rooted using *Deferrisoma camini* (GCA\_000526155.1) as the  
652 outgroup (not shown). Orders are shown as colored wedges: UBA9968, pink; HRBin30, tan;  
653 Bin18, blue; UBA12105, cyan; UTPR01, purple; UBA1149, orange; and Binatales, green.  
654 Within each order, families are delineated by grey borders, and genera are shown as colored  
655 squares on the branches. Bootstrap values are shown as purple bubbles for nodes with  $\geq 70\%$   
656 support. The tracks around the tree represent (innermost-outermost) GC content (with a heatmap  
657 that ranges from 53% (lightest) to 73% (darkest)), expected genome size (bar chart), and  
658 classification of the ecosystem from which the genome originated. All genomes analyzed in this  
659 study were  $>70\%$  complete and  $<10\%$  contaminated. Completion/contamination percentages,  
660 and individual genomes assembly size are shown in Tables S2, and S3, respectively.

661 **Figure 2.** C1 substrate degradation capacities in the Binatota. (A) Heatmap of the distribution of  
662 various C1 oxidation genes in Binatota genomes from different orders. The heatmap colors (as  
663 explained in the key) correspond to the percentage of genomes in each order encoding a  
664 homologue of the gene in the column header. Pathways involving more than one gene for  
665 methylamine and methylated sulfur compounds degradation are shown next to the heatmap. To  
666 the right, the per-order predicted C1 oxidation capacity is shown as a heatmap with the colors  
667 corresponding to the percentage of genomes in each order where the full degradation pathway  
668 was detected for the substrate in the column header. These include *pmoABC* for methane,  
669 *soxFJG*, *mdh2*, and/or *mno* for methanol, *mau* and/or indirect glutamate pathway for  
670 methylamine, *sfnG* and *ssuD* for dimethylsulfone, *dso*, *sfnG* and *ssuD*, or *dmoA* for



671 dimethylsulfide (DMS), *ssuD* for methane sulfonic acid (MSA), and *dcmA* for dichloromethane  
672 (DCM). pMMO: particulate methane monooxygenase with *pmoA*, *pmoB*, *pmoC*, *pmoD* denoting  
673 subunits A, B, C, and D; XoxF-type (*xoxF*, *xoxJ*, *xoxG*), MDH2-type (*mdh2*), and MNO/MDO-  
674 type (*mno*) methanol dehydrogenases; direct oxidation methylamine dehydrogenase (*mauABC*),  
675 indirect glutamate pathway (*gmaS*:  $\gamma$ -glutamylmethylamide synthase; *mgsABC*: *N*-methyl-L-  
676 glutamate synthase; methylglutamate dehydrogenase *mgdABCD*); dimethylsulfide (DMS)  
677 monooxygenase (*dmoA*), dimethyl sulfone monooxygenase (*sfnG*), dimethylsulfide  
678 monooxygenase (*dso*), alkane sulfonic acid monooxygenase (*ssuD*); and dichloromethane  
679 dehalogenase (*dcmA*). (B) Maximum likelihood phylogenetic tree highlighting the relationship  
680 between Binatota methanol dehydrogenases in relation to other methylotrophic taxa. Bootstrap  
681 support (from 100 bootstraps) is shown for branches with >50%. (C) Organization of pMMO  
682 genes in Binatota genomes, and the number of genomes where each organization was observed.  
683 x: Hypothetical protein (D) Maximum likelihood tree highlighting the relationship between  
684 Binatota *pmoA* genes to methanotrophic taxa and environmental amplicons. Bootstrap support  
685 (100 bootstraps) is shown for branches with >50% support. Sequences from Binatota genomes  
686 (shown as Order followed by Bin name then *pmoA* protein ID in parentheses) are in magenta and  
687 fall into two clusters; Actinobacteria/SAR324 cluster, and TUSC uncultured cluster 2. Clusters  
688 from previously studied pMMOs known to reduce methane are in orange, while those known to  
689 reduce short chain alkanes but not methane are in cyan (collective data from <sup>28, 29, 30, 131, 132, 133</sup>).  
690 The tree was rooted using the *amoA* sequence of *Candidatus Nitrosarchaeum limnium* SFB1  
691 (EGG41084.1) as an outgroup. (E) Predicted particulate methane monooxygenase (PmoABC)  
692 3D structure (grey) from a Cluster 2 TUSC-affiliated Binatota genome (Genome  
693 3300027968\_51, left), and an Actinobacteria/SAR324-affiliated Binatota genome (Genome

694 GCA\_002238415.1, right) both superimposed on pMMO from the model methanotroph  
695 *Methylococcus capsulatus* str. Bath (pdb: 3RGB) (green) with a global model quality estimate of  
696 0.7, and 0.62, respectively, and a quaternary structure quality score of 0.57, and 0.55,  
697 respectively.

698 **Figure 3.** Formaldehyde oxidation and assimilation capabilities encoded by Binatota genomes.  
699 (A) Heatmap of the distribution of formaldehyde oxidation genes in Binatota genomes from  
700 different orders. The heatmap colors (as explained in the key) correspond to the percentage of  
701 genomes in each order encoding a homologue of the gene in the column header. Shown are the  
702 different routes of formaldehyde oxidation, including the (myco)thiol-dependent formaldehyde  
703 dehydrogenase *fadH/mscR* (along with mycothiol biosynthesis genes (*mshABC*)), the H<sub>4</sub>F-linked  
704 pathway (comprising the genes bifunctional methylene-H<sub>4</sub>F dehydrogenase and methenyl-H<sub>4</sub>F  
705 cyclohydrolase (*fold*), reversible formyl-H<sub>4</sub>F ligase (*ftfL*), irreversible formyl-H<sub>4</sub>F hydrolase  
706 (*purU*), the glutathione-independent formaldehyde dehydrogenase (*fdhA*), and the glutathione-  
707 dependent formaldehyde (comprising the S-(hydroxymethyl)glutathione synthase (*gfa*), NAD-  
708 and glutathione-dependent formaldehyde dehydrogenase (*frmA*), S-formylglutathione hydrolase  
709 (*frmB*)). Also shown is the distribution of the NAD-dependent formate dehydrogenase (EC:  
710 1.17.1.9) (*fdh*) for formate oxidation. (B) Overview of the pathways for formaldehyde  
711 assimilation via the serine cycle (left), and glyoxylate regeneration via the ethylmalonyl-CoA  
712 pathway and the glyoxylate shunt (GS) (right). Names of enzymes are shown in red and their  
713 distribution in the Binatota genomes from different orders is shown in the heatmap in (C). *glyA*,  
714 glycine hydroxymethyltransferase [EC:2.1.2.1]; *sgaA*, serine-glyoxylate transaminase  
715 [EC:2.6.1.45]; *hprA*, glycerate dehydrogenase [EC:1.1.1.29]; *gck*, glycerate 2-kinase  
716 [EC:2.7.1.165]; *ppc*, phosphoenolpyruvate carboxylase [EC:4.1.1.31]; *pckA*,

717 phosphoenolpyruvate carboxykinase; *mdh*, malate dehydrogenase [EC:1.1.1.37]; *mtkA/B*, malate-  
718 CoA ligase [EC:6.2.1.9]; *mcl*, methyl-CoA/(S)-citramalyl-CoA lyase [EC:4.1.3.24 4.1.3.25];  
719 *aceA*, isocitrate lyase [EC:4.1.3.1]; *aceB*, malate synthase [EC:2.3.3.9]; *phbB*, acetoacetyl-CoA  
720 reductase [EC:1.1.1.36]; *croR*, 3-hydroxybutyryl-CoA dehydratase [EC:4.2.1.55]; *ccr*, crotonyl-  
721 CoA carboxylase/reductase [EC:1.3.1.85]; *epi*, methylmalonyl-CoA/ethylmalonyl-CoA  
722 epimerase [EC:5.1.99.1]; *ecm*, ethylmalonyl-CoA mutase [EC:5.4.99.63]; *mcd*, (2S)-  
723 methylsuccinyl-CoA dehydrogenase [EC:1.3.8.12]; *mch*, 2-methylfumaryl-CoA hydratase  
724 [EC:4.2.1.148]; *mut*, methylmalonyl-CoA mutase [EC:5.4.99.2]; *mcmA1/A2*, methylmalonyl-  
725 CoA mutase [EC:5.4.99.2]. Abbreviations: PEP, phosphoenol pyruvate; OAA, oxaloacetate.  
726 **Figure 4.** Alkane, and fatty acid degradation capabilities encoded in Binatota genomes. (A)  
727 Heatmap of the distribution of (halo)alkane degradation to alcohol. The heatmap colors (as  
728 explained in the key) correspond to the percentage of genomes in each order encoding a  
729 homologue of the gene in the column header. The per-order predicted alkane degradation  
730 capacity is shown to the right as a heatmap with the colors corresponding to the percentage of  
731 genomes in each order where the full degradation pathway was detected for the substrate in the  
732 column header. These include *pmoABC* and/or *prmABC* for short-chain alkanes, *alkB*, or *cyp153*  
733 for medium-chain alkanes, *ladA* for long-chain alkanes, and *dhaA* for haloalkanes. (B) Heatmap  
734 of the distribution of various chain-length fatty acid and haloacid degradation genes in Binatota  
735 genomes. The heatmap colors (as explained in the key) correspond to the percentage of genomes  
736 in each order encoding a homologue of the gene in the column header. (C) Propionyl-CoA  
737 degradation pathways encoded by the Binatota genomes. The methylmalonyl CoA (MMCoA)  
738 pathway is shown in blue, while the 2-methylcitrate pathway is shown in green. In some  
739 genomes, the MMCoA pathway seems to be functional but with a slight modification (shown in

740 purple) that includes glyoxylate assimilation and regeneration. *pmoABC*, particulate methane  
741 monooxygenase with denoting subunits A, B, and C; *prmABC*, propane 2-monooxygenase  
742 [EC:1.14.13.227]; *alkB*, alkane 1-monooxygenase [EC:1.14.15.3]; *cyp153*, Cytochrome P450  
743 alkane hydroxylase [EC 1.14.15.1]; *ladA*, long-chain alkane monooxygenase [EC:1.14.14.28];  
744 *dhaA*, haloalkane dehalogenase [EC:3.8.1.5]; *adh*, alcohol dehydrogenase [EC:1.1.1.1];  
745 EC:1.1.1.80, isopropanol dehydrogenase (NADP+) [EC:1.1.1.80]; *acmA*, acetone  
746 monooxygenase (methyl acetate-forming) [EC:1.14.13.226]; *acmB*, methyl acetate hydrolase  
747 [EC:3.1.1.114]; EC:1.2.1.3, aldehyde dehydrogenase (NAD+) [EC:1.2.1.3]; E1.2.1.10,  
748 acetaldehyde dehydrogenase (acetylating) [EC:1.2.1.10]; *acdAB*, acetate---CoA ligase (ADP-  
749 forming) [EC:6.2.1.13]; *acs*, acetyl-CoA synthase [EC:2.3.1.169]; *atoAD*, acetate  
750 CoA/acetoacetate CoA-transferase [EC:2.8.3.8 2.8.3.9]; EC:6.2.1.2, medium-chain acyl-CoA  
751 synthetase [EC:6.2.1.2]; *fadD*, long-chain acyl-CoA synthetase [EC:6.2.1.3]; *pccA*, propionyl-  
752 CoA carboxylase alpha chain [EC:6.4.1.3]; *epi*, methylmalonyl-CoA/ethylmalonyl-CoA  
753 epimerase [EC:5.1.99.1]; *mut*, methylmalonyl-CoA mutase [EC:5.4.99.2]; *mcl*, malyl-CoA/(S)-  
754 citramalyl-CoA lyase [EC:4.1.3.24 4.1.3.25]; *mch*, 2-methylfumaryl-CoA hydratase  
755 [EC:4.2.1.148]; *mct*, 2-methylfumaryl-CoA isomerase [EC:5.4.1.3]; *meh*, 3-methylfumaryl-CoA  
756 hydratase [EC:4.2.1.153]; *smtAB*, succinyl-CoA:(S)-malate CoA-transferase subunit A  
757 [EC:2.8.3.22]; *prpB*, methylisocitrate lyase [EC:4.1.3.30]; *prpC*, 2-methylcitrate synthase  
758 [EC:2.3.3.5]; *prpD*, 2-methylcitrate dehydratase [EC:4.2.1.79]; *bcd*, butyryl-CoA dehydrogenase  
759 [EC:1.3.8.1]; *acd*, acyl-CoA dehydrogenase [EC:1.3.8.7]; *paaF*, enoyl-CoA hydratase  
760 [EC:4.2.1.17]; *crt*, enoyl-CoA hydratase [EC:4.2.1.17]; *paaH*, 3-hydroxybutyryl-CoA  
761 dehydrogenase [EC:1.1.1.157]; *phbB*, acetoacetyl-CoA reductase [EC:1.1.1.36]; *atoB*, acetyl-  
762 CoA C-acetyltransferase [EC:2.3.1.9]; *fadJ*, 3-hydroxyacyl-CoA dehydrogenase / enoyl-CoA

763 hydratase / 3-hydroxybutyryl-CoA epimerase [EC:1.1.1.35 4.2.1.17 5.1.2.3]; *fadA*, acetyl-CoA  
764 acyltransferase [EC:2.3.1.16]; *dehH*, 2-haloacid dehalogenase [EC:3.8.1.2]; EC:3.8.1.3,  
765 haloacetate dehalogenase [EC:3.8.1.3]; *glcDEF*, glycolate oxidase [EC:1.1.3.15]; EC:1.1.3.15,  
766 (S)-2-hydroxy-acid oxidase [EC:1.1.3.15].

767 **Figure 5.** Electron transport chain in the Binatota. (A) Heatmap of the distribution of electron  
768 transport chain components in the Binatota genomes and electrons entry points from various  
769 substrates. The heatmap colors (as explained in the key) correspond to the percentage of  
770 genomes in each order encoding a homologue of the gene in the column header. All subunits of  
771 complexes I (NADH-quinone oxidoreductase [EC:7.1.1.2]), and II (succinate dehydrogenase  
772 /fumarate reductase [EC:1.3.5.1 1.3.5.4]) were encoded in all genomes but are shown here as  
773 single components for ease of visualization. Genes encoding quinone-cytochrome C reductase  
774 activities belonged to either complex III (cytochrome bc1; ISP/*cytb/cyt1*) and/or alternate  
775 cytochrome III (ACIII; *actABCDEF*), while genes encoding cytochrome c oxidase activities  
776 (complex IV) belonged to different families including family A (cytochrome c oxidase aa3;  
777 *coxABC*), family C (cytochrome c oxidase cbb3; *ccoNOP*), and/or cytochrome *bd* (*cydAB*).  
778 Possible electron transfer proteins between complex III (or alternate complex III) and complex  
779 IV belonging to different cytochrome c families are shown. Also shown in (A) is the distribution  
780 of the three subunits of the type I respiratory O<sub>2</sub>-tolerant H<sub>2</sub>-uptake [NiFe] hydrogenase  
781 (*hyaABC*) in Binatota genomes. (B) A cartoon depicting all electron transfer complexes (I, II,  
782 ACIII, IV) embedded in the inner membrane, along with the particulate methane monooxygenase  
783 (pMMO), and the H<sub>2</sub>-uptake [NiFe] hydrogenase (HyaABC). All genomes also encoded an F-  
784 type ATP synthase complex (V). Substrates potentially supporting growth are shown in blue with  
785 predicted entry points to the ETC shown as dotted black arrows. Sites of proton extrusion to the

786 periplasm and PMF creation are shown as solid black lines, while sites of electron (e<sup>-</sup>) transfer  
787 are shown as dotted green lines. Three possible physiological reductants are shown for pMMO  
788 (as dotted green arrows); the quinone pool coupled to ACIII, NADH, and/or some of the reduced  
789 quinones generated through H<sub>2</sub> oxidation by HyaABC. (C) Maximum likelihood phylogenetic  
790 tree showing the classification of the *hyaA* genes encoded by the Binatota genomes (magenta) in  
791 relation to other [Ni-Fe] hydrogenases. The [Fe-Fe] hydrogenase of *Methanobacterium formicum*  
792 was used as the outgroup. Bootstrap support (from 100 bootstraps) is shown for branches  
793 with >50% support.

794 **Figure 6.** Carotenoids biosynthesis capabilities in Binatota genomes. (A) Distribution of  
795 carotenoid biosynthesis genes in the Binatota genomes. The heatmap colors (as explained in the  
796 key) correspond to the percentage of genomes in each order encoding a homologue of the gene in  
797 the column header. (B) Carotenoid biosynthesis scheme in Binatota based on the identified  
798 genes. Genes encoding enzymes catalyzing each step are shown in red and their descriptions  
799 with EC numbers are shown to the right. Binatota genomes encode the capability to  
800 biosynthesize both exclusively hydrocarbon carotenes (white boxes), or the oxygenated  
801 xanthophylls (grey boxes).

802 **Figure 7.** Bacteriochlorophylls biosynthesis genes encountered in Binatota genomes studied  
803 suggesting an incomplete pathway for bacteriochlorophyll *a*, *c*, and/or *d* biosynthesis.

804 (A) Distribution of chlorophyll biosynthesis genes in Binatota genomes. The heatmap colors (as  
805 explained in the key) correspond to the percentage of genomes in each order encoding a  
806 homologue of the gene in the column header. (B) Bacteriochlorophylls biosynthesis pathway.  
807 Genes identified in at least one Binatota genome are shown in red boldface text, while these with  
808 no homologues in the Binatota genomes are shown in blue text. Gene descriptions with EC

809 numbers are shown to the right of the figure. (C) Distribution patterns of bacteriochlorophyll  
810 biosynthesis genes. The search was conducted in the functionally annotated bacterial tree of life  
811 AnnoTree<sup>®</sup> using single KEGG orthologies implicated in chlorophyll biosynthesis. Gene names  
812 are shown on the X-axis, total number of hits are shown above the bars for each gene, and the  
813 percentage of hits in genomes from photosynthetic (■) versus non-photosynthetic (■) genera  
814 are in the stacked bars.

815 **Figure 8.** Ecological distribution of Binatota-affiliated 16S rRNA sequences in GenBank nt  
816 database. Binatota orders are shown on the X-axis, while percentage abundance in different  
817 environments (classified based on the GOLD ecosystem classification scheme) are shown on the  
818 Y-axis (A). Further sub-classifications for each environment are shown for (B) terrestrial, (C)  
819 freshwater, (D) marine, (E) host-associated, and (F) engineered environments. The total number  
820 of hit sequences for each order are shown above the bar graphs. Details including GenBank  
821 accession number of hit sequences are shown in Extended Data 2. Order UBA12015 genome  
822 assembly did not contain a 16S rRNA gene, and so this order is not included in the analysis.

823 **Figure 9.** Cartoon depicting different metabolic capabilities encoded in the Binatota genomes.  
824 Enzymes for C1 metabolism are shown in blue and include the periplasmic particulate methane  
825 monooxygenase (pMMO), methanol dehydrogenase (*xoxFG*), and methylamine dehydrogenase  
826 (*mauABC*), as well as the cytoplasmic formaldehyde dehydrogenase (FaldH), and formate  
827 dehydrogenase (FDH). Electron transport chain is shown as a green rectangle. Electron transfer  
828 from periplasmic enzymes to the ETC is shown as dotted green lines (details of the ETC are  
829 shown in Figure 5b). The sites of proton extrusion to the periplasm are shown as black arrows, as  
830 is the F-type ATP synthase. Carbon dissimilation routes are shown as red arrows, while  
831 assimilatory routes are shown as purple arrows. Details of the assimilatory pathways are shown

832 in Figures 2 and 3. Reducing equivalents potentially fueling the ETC (NAD(P)H, and FADH<sub>2</sub>)  
833 are shown in boldface. All substrates predicted to support growth are shown in boldface within  
834 grey boxes. A flagellum is also depicted, the biosynthetic genes of which were identified in  
835 genomes belonging to all orders except Bin18, HRBin30, and UBA1149. The cell is also  
836 depicted as rod-shaped based on the identification of the rod shape determining protein *rodA* in  
837 all genomes, and the rod-shape determining proteins *mreB* and *mreC* in genomes from all orders  
838 except UBA1149. Abbreviations: CBB, Calvin Bensen Basham cycle; Fal-DH, NAD-linked  
839 glutathione-independent formaldehyde dehydrogenase, *fdhA*; FDH, NAD-dependent formate  
840 dehydrogenase [EC: 1.17.1.9]; Fum, fumarate; GS, glyoxylate shunt; H<sub>4</sub>F, tetrahydrofolate;  
841 HyaABC, type I respiratory O<sub>2</sub>-tolerant H<sub>2</sub>-uptake [NiFe] hydrogenase; *mauABC*, methylamine  
842 dehydrogenase; *pmoABC*, particulate methane monooxygenase; *soxFG*, soxF-type methanol  
843 dehydrogenase; succ, succinate; TCA, tricarboxylic acid cycle; V, F-type ATP synthase  
844 [EC:7.1.2.2 7.2.2.1].



845 **References**

- 846 1. Hug LA, *et al.* Critical biogeochemical functions in the subsurface are associated with  
847 bacteria from new phyla and little studied lineages. *Environ. Microbiol.* **18**, 159-173  
848 (2016).  
849
- 850 2. Engelberts JP, Robbins SJ, de Goeij JM, Aranda M, Bell SC, Webster NS.  
851 Characterization of a sponge microbiome using an integrative genome-centric approach.  
852 *ISME J.* **14**, 1100-1110 (2020).  
853
- 854 3. Vavourakis CD, *et al.* Metagenomes and metatranscriptomes shed new light on the  
855 microbial-mediated sulfur cycle in a Siberian soda lake. *BMC Biol.* **17**, 69 (2019).  
856
- 857 4. Hu P, *et al.* Simulation of Deepwater Horizon oil plume reveals substrate specialization  
858 within a complex community of hydrocarbon degraders. *Proc. Natl. Acad. Sci. USA* **114**,  
859 7432-7437 (2017).  
860
- 861 5. Doud DFR, *et al.* Function-driven single-cell genomics uncovers cellulose-degrading  
862 bacteria from the rare biosphere. *ISME J* **14**, 659-675 (2019).  
863
- 864 6. Anantharaman K, *et al.* Expanded diversity of microbial groups that shape the  
865 dissimilatory sulfur cycle. *ISME J* **12**, 1715-1728 (2018).  
866
- 867 7. Becraft ED, *et al.* Rokubacteria: Genomic giants among the uncultured bacterial phyla.  
868 *Front. Microbiol.* **8**, 2264 (2017).  
869
- 870 8. Rinke R, *et al.* A phylogenomic and ecological analysis of the globally abundant Marine  
871 Group II archaea (Ca. Poseidoniales ord. nov.). *ISME J.* **13**, 663-675 (2019).  
872
- 873 9. Farag IF, Davis JP, Youssef NH, Elshahed MS. Global patterns of abundance, diversity  
874 and community structure of the Aminicenantes (Candidate Phylum OP8). *PloS one* **9**,  
875 e92139 (2014).  
876
- 877 10. Zhou Z, Tran PQ, Kieft K, Anantharaman K. Genome diversification in globally  
878 distributed novel marine Proteobacteria is linked to environmental adaptation. *ISME J.*  
879 **14**, 2060-2077 (2020).  
880
- 881 11. Youssef NH, Blainey PC, Quake SR, Elshahed MS. Partial genome assembly for a  
882 candidate division OP11 single cell from an anoxic spring (Zodletone Spring,  
883 Oklahoma). *Appl. Environ. Microbiol.* **77**, 7804-7814 (2011).  
884
- 885 12. Rinke C, *et al.* Insights into the phylogeny and coding potential of microbial dark matter.  
886 *Nature* **499**, 431-437 (2013).  
887
- 888 13. Beam JP, Becraft ED, Brown KM, Schulz F, Jarett JK. Ancestral absence of electron  
889 transport chains in Patescibacteria and DPANN. *Front. Microbiol.*  
890 <https://doi.org/10.3389/fmicb.2020.01848> (2020).

- 891  
892 14. Parks DH, *et al.* A standardized bacterial taxonomy based on genome phylogeny  
893 substantially revises the tree of life. *Nat. Biotechnol.* **36**, 996–1004 (2018)  
894  
895 15. Parks DH, *et al.* Recovery of nearly 8,000 metagenome-assembled genomes substantially  
896 expands the tree of life. *Nat. Microbiol.* **2**, 1533-1542 (2017).  
897  
898 16. Nayfach S, *et al.* A genomic catalogue of Earth’s microbiomes. *Nat. Biotechnol.*  
899 **Accpeted**, (2020).  
900  
901 17. Chuvochina M, *et al.* The importance of designating type material for uncultured taxa.  
902 *Syst Appl Microbiol* **42**, 15-21 (2018).  
903  
904 18. Bowers RM, *et al.* Minimum information about a single amplified genome (MISAG) and  
905 a metagenome-assembled genome (MIMAG) of bacteria and archaea. *Nat. Biotechnol.*  
906 **35**, 725-731 (2017).  
907  
908 19. Quast C, *et al.* The SILVA ribosomal RNA gene database project: improved data  
909 processing and web-based tools. *Nucl. Acids Res.* **41**, D590-596 (2013).  
910  
911 20. Hektor HJ, Kloosterman H, Dijkhuizen L. Nicotinoprotein methanol dehydrogenase  
912 enzymes in Gram-positive methylotrophic bacteria. *J. Mol. Cat. B.* **8**, 103-109 (2000).  
913  
914 21. Kalyuzhnaya MG, Hristova KR, Lidstrom ME, Chistoserdova L. Characterization of a  
915 novel methanol dehydrogenase in representatives of Burkholderiales: implications for  
916 environmental detection of methylotrophy and evidence for convergent evolution. *J.*  
917 *Bacteriol.* **190**, 3817-3823 (2008).  
918  
919 22. Chistoserdova L. Modularity of methylotrophy, revisited. *Environ. Microbiol.* **13**, 2603-  
920 2622 (2011).  
921  
922 23. Erikstad HA, Jensen S, Keen TJ, Birkeland NK. Differential expression of particulate  
923 methane monooxygenase genes in the verrucomicrobial methanotroph  
924 '*Methylophilum kamchatkense*' Kam1. *Extremophiles* **16**, 405-409 (2012).  
925  
926 24. Ettwig KF, *et al.* Nitrite-driven anaerobic methane oxidation by oxygenic bacteria.  
927 *Nature* **464**, 543-548 (2010).  
928  
929 25. Iguchi H, Yurimoto H, Sakai Y. Soluble and particulate methane monooxygenase gene  
930 clusters of the type I methanotroph *Methylovulum miyakonense* HT12. *FEMS Microbiol.*  
931 *Lett.* **312**, 71-76 (2010).  
932  
933 26. Ricke P, Erkel C, Kube M, Reinhardt R, Liesack W. Comparative analysis of the  
934 conventional and novel pmo (particulate methane monooxygenase) operons from  
935 *Methylocystis* strain SC2. *Appl. Environ. Microbiol.* **70**, 3055-3063 (2004).  
936

- 937 27. Fisher OS, *et al.* Characterization of a long overlooked copper protein from methane- and  
938 ammonia-oxidizing bacteria. *Nat. Commun.* **9**, 4276 (2018).  
939
- 940 28. Rochman FF, *et al.* Novel copper-containing membrane monooxygenases (CuMMOs)  
941 encoded by alkane-utilizing Betaproteobacteria. *ISME J.* **14**, 714-726 (2020).  
942
- 943 29. Knief C. Diversity and habitat preferences of cultivated and uncultivated aerobic  
944 methanotrophic bacteria evaluated based on pmoA as molecular marker. *Front.*  
945 *Microbiol.* **6**, 1346 (2015).  
946
- 947 30. Li M, Jain S, Baker BJ, Taylor C, Dick GJ. Novel hydrocarbon monooxygenase genes in  
948 the metatranscriptome of a natural deep-sea hydrocarbon plume. *Environ. Microbiol.* **16**,  
949 60-71 (2014).  
950
- 951 31. Sheik CS, Jain S, Dick GJ. Metabolic flexibility of enigmatic SAR324 revealed through  
952 metagenomics and metatranscriptomics. *Environ. Microbiol.* **16**, 304-317 (2014).  
953
- 954 32. Kalyuzhnaya MG, Zabinsky R, Bowerman S, Baker DR, Lidstrom ME, Chistoserdova L.  
955 Fluorescence in situ hybridization-flow cytometry-cell sorting-based method for  
956 separation and enrichment of type I and type II methanotroph populations. *Appl. Environ.*  
957 *Microbiol.* **72**, 4293-4301 (2006).  
958
- 959 33. Hamamura N, Yeager CM, Arp DJ. Two distinct monooxygenases for alkane oxidation  
960 in *Nocardioides* sp. strain CF8. *Appl. Environ. Microbiol.* **67**, 4992-4998 (2001).  
961
- 962 34. Lessmeier L, Hoefener M, Wendisch VF. Formaldehyde degradation in *Corynebacterium*  
963 *glutamicum* involves acetaldehyde dehydrogenase and mycothiol-dependent  
964 formaldehyde dehydrogenase. *Microbiology (Reading, England)* **159**, 2651-2662 (2013).  
965
- 966 35. Dubey AA, Wani SR, Jain V. Methylophony in *Mycobacteria*: dissection of the methanol  
967 metabolism pathway in *Mycobacterium smegmatis*. *J. Bacteriol.* **200**, e00288-18 (2018).  
968
- 969 36. Kornberg HL, Krebs HA. Synthesis of cell constituents from C2-units by a modified  
970 tricarboxylic acid cycle. *Nature* **179**, 988-991 (1957).  
971
- 972 37. Alber BE, Spanheimer R, Ebenau-Jehle C, Fuchs G. Study of an alternate glyoxylate  
973 cycle for acetate assimilation by *Rhodobacter sphaeroides*. *Mol. Microbiol.* **61**, 297-309  
974 (2006).  
975
- 976 38. Chen Q, Janssen DB, Witholt B. Growth on octane alters the membrane lipid fatty acids  
977 of *Pseudomonas oleovorans* due to the induction of alkB and synthesis of octanol. *J.*  
978 *Bacteriol.* **177**, 6894-6901 (1995).  
979
- 980 39. van Beilen JB, Funhoff EG. Alkane hydroxylases involved in microbial alkane  
981 degradation. *Appl. Microbiol. Biotechnol.* **74**, 13-21 (2007).  
982

- 983 40. Li L, *et al.* Crystal structure of long-chain alkane monooxygenase (LadA) in complex  
984 with coenzyme FMN: unveiling the long-chain alkane hydroxylase. *J. Mol. Biol.* **376**,  
985 453-465 (2008).  
986
- 987 41. Nagata Y, Miyauchi K, Damborsky J, Manova K, Ansorgova A, Takagi M. Purification  
988 and characterization of a haloalkane dehalogenase of a new substrate class from a  
989 gamma-hexachlorocyclohexane-degrading bacterium, *Sphingomonas paucimobilis* UT26.  
990 *Appl. Environ. Microbiol.* **63**, 3707-3710 (1997).  
991
- 992 42. Sun C, *et al.* Structure of the alternative complex III in a supercomplex with cytochrome  
993 oxidase. *Nature* **557**, 123-126 (2018).  
994
- 995 43. Choi DW, *et al.* The membrane-associated methane monooxygenase (pMMO) and  
996 pMMO-NADH:quinone oxidoreductase complex from *Methylococcus capsulatus* Bath.  
997 *J. Bacteriol.* **185**, 5755-5764 (2003).  
998
- 999 44. Nguyen HH, Elliott SJ, Yip JH, Chan SI. The particulate methane monooxygenase from  
1000 *Methylococcus capsulatus* (Bath) is a novel copper-containing three-subunit enzyme.  
1001 Isolation and characterization. *J. Biol. Chem.* **273**, 7957-7966 (1998).  
1002
- 1003 45. Wulff P, Day CC, Sargent F, Armstrong FA. How oxygen reacts with oxygen-tolerant  
1004 USA **111**, 6606-6611 (2014).  
1005
- 1006 46. Sargent F. The Model [NiFe]-Hydrogenases of *Escherichia coli*. *Adv. Microb. Physiol.*  
1007 **68**, 433-507 (2016).  
1008
- 1009 47. Volbeda A, Darnault C, Parkin A, Sargent F, Armstrong FA, Fontecilla-Camps JC.  
1010 Crystal structure of the O<sub>2</sub>-tolerant membrane-bound hydrogenase 1 from *Escherichia*  
1011 *coli* in complex with its cognate cytochrome b. *Structure* **21**, 184-190 (2013).  
1012
- 1013 48. Carere CR, *et al.* Mixotrophy drives niche expansion of verrucomicrobial methanotrophs.  
1014 *ISME J.* **11**, 2599-2610 (2017).  
1015
- 1016 49. Chistoserdova L, Kalyuzhnaya MG, Lidstrom ME. The expanding world of  
1017 methylotrophic metabolism. *Ann. Rev. Microbiol.* **63**, 477-499 (2009).  
1018
- 1019 50. Boden R, Thomas E, Savani P, Kelly DP, Wood AP. Novel methylotrophic bacteria  
1020 isolated from the River Thames (London, UK). *Environ. Microbiol.* **10**, 3225-3236  
1021 (2008).  
1022
- 1023 51. McTaggart TL, *et al.* Genomics of methylotrophy in Gram-positive methylamine-  
1024 utilizing bacteria. *Microorganisms* **3**, 94-112 (2015).  
1025
- 1026 52. Pol A, Heijmans K, Harhangi HR, Tedesco D, Jetten MSM, Op den Camp HJM.  
1027 Methanotrophy below pH 1 by a new Verrucomicrobia species. *Nature* **450**, 874-878  
1028 (2007).

- 1029  
1030 53. Ettwig KF, van Alen T, van de Pas-Schoonen KT, Jetten MS, Strous M. Enrichment and  
1031 molecular detection of denitrifying methanotrophic bacteria of the NC10 phylum. *Appl.*  
1032 *Environ. Microbiol.* **75**, 3656-3662 (2009).  
1033  
1034 54. Diamond S, *et al.* Mediterranean grassland soil C-N compound turnover is dependent on  
1035 rainfall and depth, and is mediated by genomically divergent microorganisms. *Nat.*  
1036 *Microbiol.* **4**, 1356-1367 (2019).  
1037  
1038 55. Butterfield CN, *et al.* Proteogenomic analyses indicate bacterial methylotrophy and  
1039 archaeal heterotrophy are prevalent below the grass root zone. *PeerJ* **4**, e2687 (2016).  
1040  
1041 56. Davamani V, Parameswari E, Arulmani S. Mitigation of methane gas emissions in  
1042 flooded paddy soil through the utilization of methanotrophs. *Sci Tot. Environ.* **726**,  
1043 138570 (2020).  
1044  
1045 57. Khmelenina VN, Colin Murrell J, Smith TJ, Trotsenko YA. Physiology and biochemistry  
1046 of the aerobic methanotrophs. In: *Aerobic utilization of hydrocarbons, oils and lipids* (ed  
1047 Rojo F). Springer International Publishing (2018).  
1048  
1049 58. Mohammadi SS, Pol A, van Alen T, Jetten MSM, Op den Camp HJM. Ammonia  
1050 oxidation and nitrite reduction in the verrucomicrobial methanotroph *Methylacidiphilum*  
1051 *fumariolicum* SolV. *Front. Microbiol.* **8**, 1901 (2017).  
1052  
1053 59. Prince RC, Amande TJ, McGenity TJ. Prokaryotic hydrocarbon degraders. In: *Taxonomy,*  
1054 *genomics and ecophysiology of hydrocarbon-degrading microbes* (ed McGenity TJ).  
1055 Springer International Publishing (2019).  
1056  
1057 60. Le Mer J, Roger P. Production, oxidation, emission and consumption of methane by  
1058 soils: A review. *Eur. J. Soil Biol.* **37**, 25-50 (2001).  
1059  
1060 61. Wang Z, Zeng D, Patrick WH. Methane emissions from natural wetlands. *Environ.*  
1061 *Monit. Assess.* **42**, 143-161 (1996).  
1062  
1063 62. He S, *et al.* Patterns in wetland microbial community composition and functional gene  
1064 repertoire associated with methane emissions. *mBio* **6**, e00066-00015 (2015).  
1065  
1066 63. Angle JC, *et al.* Methanogenesis in oxygenated soils is a substantial fraction of wetland  
1067 methane emissions. *Nat. Commun.* **8**, 1567 (2017).  
1068  
1069 64. Kolb S. Aerobic methanol-oxidizing Bacteria in soil. *FEMS Microbiol. Lett.* **300**, 1-10  
1070 (2009).  
1071  
1072 65. Conrad R. The global methane cycle: recent advances in understanding the microbial  
1073 processes involved. *Environ. Microbiol. Rep.* **1**, 285-292 (2009).  
1074

- 1075 66. McCollom TM. Laboratory simulations of abiotic hydrocarbon formation in earth's deep  
1076 subsurface. *Rev.n Mineral. Geochem.* **75**, 467-494 (2013).  
1077
- 1078 67. Wang W, Li Z, Zeng L, Dong C, Shao Z. The oxidation of hydrocarbons by diverse  
1079 heterotrophic and mixotrophic bacteria that inhabit deep-sea hydrothermal ecosystems.  
1080 *ISME J.* **14**, 1994-2006 (2020).  
1081
- 1082 68. Pasche N, *et al.* Methane sources and sinks in Lake Kivu. *J. Geophys. Res. Biogeosci.*  
1083 **116**, G03006 (2011).  
1084
- 1085 69. Borges AV, Abril G, Delille B, Descy J-P, Darchambeau F. Diffusive methane emissions  
1086 to the atmosphere from Lake Kivu (Eastern Africa). *J. Geophys. Res. Biogeosci.* **116**,  
1087 G03032 (2011).  
1088
- 1089 70. Llíros M, *et al.* Microbial Ecology of Lake Kivu. In: *Lake Kivu: Limnology and*  
1090 *biogeochemistry of a tropical great lake* (eds Descy J-P, Darchambeau F, Schmid M).  
1091 Springer Netherlands (2012).  
1092
- 1093 71. Chistoserdova L. Methylophony in a lake: from metagenomics to single-organism  
1094 physiology. *Appl. Environ. Microbiol.* **77**, 4705-4711 (2011).  
1095
- 1096 72. Chistoserdova L. The distribution and evolution of c1 transfer enzymes and evolution of  
1097 the Planctomycetes. In: *Planctomycetes: Cell Structure, Origins and Biology* (ed Fuerst  
1098 JA). Humana Press (2013).  
1099
- 1100 73. Auman AJ, Lidstrom ME. Analysis of sMMO-containing type I methanotrophs in Lake  
1101 Washington sediment. *Environ. Microbiol.* **4**, 517-524 (2002).  
1102
- 1103 74. Auman AJ, Stolyar S, Costello AM, Lidstrom ME. Molecular characterization of  
1104 methanotrophic isolates from freshwater lake sediment. *Appl. Environ. Microbiol.* **66**,  
1105 5259-5266 (2000).  
1106
- 1107 75. Chistoserdova L. Methylophony in natural habitats: current insights through  
1108 metagenomics. *Appl. Microbiol. Biotechnol.* **99**, 5763-5779 (2015).  
1109
- 1110 76. Kuivila KM, Murray JW, Devol AH, Lidstrom ME, Reimers CE. Methane cycling in the  
1111 sediments of Lake Washington. *Limnol. Oceanogr.* **33**, 571-581 (1988).  
1112
- 1113 77. Arellano SM, *et al.* Deep sequencing of *Myxilla (Ectyomyxilla) methanophila*, an  
1114 epibiotic sponge on cold-seep tubeworms, reveals methylophony, thiotrophy, and  
1115 putative hydrocarbon-degrading microbial associations. *Microb. Ecol.* **65**, 450-461  
1116 (2013).  
1117
- 1118 78. Tian RM, Zhang W, Cai L, Wong YH, Ding W, Qian PY. Genome reduction and  
1119 microbe-host interactions drive adaptation of a sulfur-oxidizing bacterium associated  
1120 with a cold seep sponge. *mSystems* **2**, (2017).

- 1121  
1122 79. Rubin-Blum M, *et al.* Fueled by methane: deep-sea sponges from asphalt seeps gain their  
1123 nutrition from methane-oxidizing symbionts. *ISME J.* **13**, 1209-1225 (2019).  
1124  
1125 80. Hashimoto H, Uragami C, Cogdell RJ. Carotenoids and photosynthesis. *Subcell.*  
1126 *Biochem.* **79**, 111-139 (2016).  
1127  
1128 81. Saidi-Mehrabad A, *et al.* *Methylicorpusculum oleiharenae* gen. nov., sp. nov., an aerobic  
1129 methanotroph isolated from an oil sands tailings pond. *Int. J. Syst. Evol. Microbiol.* **70**,  
1130 2499-2508 (2020).  
1131  
1132 82. Wang FQ, *et al.* *Carboxylicivirga sediminis* sp. nov., isolated from coastal sediment. *Int.*  
1133 *J. Syst. Evol. Microbiol.* **68**, 1896-1901 (2018).  
1134  
1135 83. Asker D, Awad TS, Beppu T, Ueda K. *Deinococcus misasensis* and *Deinococcus roseus*,  
1136 novel members of the genus *Deinococcus*, isolated from a radioactive site in Japan. *Syst.*  
1137 *Appl. Microbiol.* **31**, 43-49 (2008).  
1138  
1139 84. Zhou EM, *et al.* *Thermus sediminis* sp. nov., a thiosulfate-oxidizing and arsenate-  
1140 reducing organism isolated from Little Hot Creek in the Long Valley Caldera, California.  
1141 *Extremophiles* **22**, 983-991 (2018).  
1142  
1143 85. Sanford RA, Cole JR, Tiedje JM. Characterization and description of *Anaeromyxobacter*  
1144 *dehalogenans* gen. nov., sp. nov., an aryl-halorespiring facultative anaerobic  
1145 myxobacterium. *Appl. Environ. Microbiol.* **68**, 893-900 (2002).  
1146  
1147 86. Fariq A, Yasmin A, Jamil M. Production, characterization and antimicrobial activities of  
1148 bio-pigments by *Aquisalibacillus elongatus* MB592, *Salinicoccus sesuvii* MB597, and  
1149 *Halomonas aquamarina* MB598 isolated from Khewra Salt Range, Pakistan.  
1150 *Extremophiles* **23**, 435-449 (2019).  
1151  
1152 87. Ungers GE, Cooney JJ. Isolation and characterization of carotenoid pigments of  
1153 *Micrococcus roseus*. *J. Bacteriol.* **96**, 234-241 (1968).  
1154  
1155 88. Bondoso J, Albuquerque L, Nobre MF, Lobo-da-Cunha A, da Costa MS, Lage OM.  
1156 *Roseimaritima ulvae* gen. nov., sp. nov. and *Rubripirellula obstinata* gen. nov., sp. nov.  
1157 two novel planctomycetes isolated from the epiphytic community of macroalgae. *Syst.*  
1158 *Appl. Microbiol.* **38**, 8-15 (2015).  
1159  
1160 89. Chen S, Sun S, Xu Y, Liu HC. *Halococcus salsus* sp. nov., a novel halophilic archaeon  
1161 isolated from rock salt. *Int. J. Syst. Evol. Microbiol.* **68**, 3754-3759 (2018).  
1162  
1163 90. Grogan DW. Phenotypic characterization of the archaeobacterial genus *Sulfolobus*:  
1164 comparison of five wild-type strains. *J. Bacteriol.* **171**, 6710-6719 (1989).  
1165

- 1166 91. Fiedor J, Sulikowska A, Orzechowska A, Fiedor L, Burda K. Antioxidant effects of  
1167 carotenoids in a model pigment-protein complex. *Acta Biochim. Polon.* **59**, 61-64 (2012).  
1168
- 1169 92. Krisko A, Radman M. Biology of extreme radiation resistance: the way of *Deinococcus*  
1170 *radiodurans*. *Cold Spring Harbor Pers. Biol.* **5**, a012765 (2013).  
1171
- 1172 93. Du X-j, Wang X-y, Dong X, Li P, Wang S. Characterization of the desiccation tolerance  
1173 of *Cronobacter sakazakii* strains. *Front Microbiol.* **9**, 2867 (2018).  
1174
- 1175 94. Bowman JP, Sly LI, Nichols PD, Hayward AC. Revised taxonomy of the methanotrophs:  
1176 Description of *Methylobacter* gen. nov., Emendation of *Methylococcus*, Validation of  
1177 *Methylosinus* and *Methylocystis* Species, and a proposal that the family  
1178 Methylococcaceae includes only the group I methanotrophs. *Int. J. Syst. Evol. Microbiol.*  
1179 **43**, 735-753 (1993).  
1180
- 1181 95. Irvine IC, Brigham CA, Suding KN, Martiny JB. The abundance of pink-pigmented  
1182 facultative methylotrophs in the root zone of plant species in invaded coastal sage scrub  
1183 habitat. *PLoS one* **7**, e31026 (2012).  
1184
- 1185 96. Mendler K, Chen H, Parks DH, Lobb B, Hug LA, Doxey AC. AnnoTree: visualization  
1186 and exploration of a functionally annotated microbial tree of life. *Nucl. Acids Res.* **47**,  
1187 4442-4448 (2019).  
1188
- 1189 97. Meng J, *et al.* An uncultivated crenarchaeota contains functional bacteriochlorophyll a  
1190 synthase. *ISME J.* **3**, 106-116 (2009).  
1191
- 1192 98. Liu R, Cai R, Zhang J, Sun C. Heimdallarchaeota harness light energy through  
1193 photosynthesis. *bioRxiv*, 2020.2002.2020.957134 (2020).  
1194
- 1195 99. Martin WF, Bryant DA, Beatty JT. A physiological perspective on the origin and  
1196 evolution of photosynthesis. *FEMS Mmicrobiol. Rev.* **42**, 205-231 (2018).  
1197
- 1198 100. White SN, Chave AD, Reynolds GT, Van Dover CL. Ambient light emission from  
1199 hydrothermal vents on the Mid-Atlantic Ridge. *Geophys. Res. Lett.* **29**, 34-31-34-34  
1200 (2002).  
1201
- 1202 101. Gao X, Xin Y, Bell PD, Wen J, Blankenship RE. Structural analysis of alternative  
1203 complex III in the photosynthetic electron transfer chain of *Chloroflexus aurantiacus*.  
1204 *Biochemistry* **49**, 6670-6679 (2010).  
1205
- 1206 102. Chistoserdova L, Lidstrom ME. Aerobic methylotrophic prokaryotes. In: *The*  
1207 *Prokaryotes: prokaryotic physiology and biochemistry* (eds Rosenberg E, DeLong EF,  
1208 Lory S, Stackebrandt E, Thompson F). Springer Berlin Heidelberg (2013).  
1209
- 1210 103. Quayle JR, Pfennig N. Utilization of methanol by rhodospirillaceae. *Arch. Microbiol.*  
1211 **102**, 193-198 (1975).



- 1212  
1213 104. Anantharaman K, *et al.* Thousands of microbial genomes shed light on interconnected  
1214 biogeochemical processes in an aquifer system. *Nat. Commun.* **7**, 13219 (2016).  
1215  
1216 105. Hug LA, Co R. It takes a village: microbial communities thrive through interactions and  
1217 metabolic handoffs. *mSystems* **3**, e00152-00117 (2018).  
1218  
1219 106. Colman DR, Lindsay MR, Amenabar MJ, Fernandes-Martins MC, Roden ER, Boyd ES.  
1220 Phylogenomic analysis of novel Diaforarchaea is consistent with sulfite but not sulfate  
1221 reduction in volcanic environments on early Earth. *ISME J.* **14**, 1316-1331 (2020).  
1222  
1223 107. Garcia SL, Buck M, McMahon KD, Grossart H-P, Eiler A, Warnecke F. Auxotrophy and  
1224 intrapopulation complementary in the ‘interactome’ of a cultivated freshwater model  
1225 community. *Mol. Ecol.* **24**, 4449-4459 (2015).  
1226  
1227 108. Croft MT, Lawrence AD, Raux-Deery E, Warren MJ, Smith AG. Algae acquire vitamin  
1228 B12 through a symbiotic relationship with bacteria. *Nature* **438**, 90-93 (2005).  
1229  
1230 109. Parks DH, Imelfort M, Skennerton CT, Hugenholtz P, Tyson GW. CheckM: assessing the  
1231 quality of microbial genomes recovered from isolates, single cells, and metagenomes.  
1232 *Genome Res.* **25**, 1043-1055 (2015).  
1233  
1234 110. Parks DH, Chuvochina M, Chaumeil PA, Rinke C, Mussig AJ, Hugenholtz P. A  
1235 complete domain-to-species taxonomy for Bacteria and Archaea. *Nat. Biotechnol.*  
1236 **38**, 1079-1086 (2020).  
1237  
1238 111. Chaumeil PA, Mussig AJ, Hugenholtz P, Parks DH. GTDB-Tk: a toolkit to classify  
1239 genomes with the Genome Taxonomy Database. *Bioinformatics* **36**, 1925-1927 (2019).  
1240  
1241 112. Stamatakis A. RAxML version 8: a tool for phylogenetic analysis and post-analysis of  
1242 large phylogenies. *Bioinformatics* **30**, 1312-1313 (2014).  
1243  
1244 113. Lagesen K, Hallin P, Rødland EA, Staerfeldt HH, Rognes T, Ussery DW. RNAmmer:  
1245 consistent and rapid annotation of ribosomal RNA genes. *Nucl. Acids Res.* **35**, 3100-3108  
1246 (2007).  
1247  
1248 114. Hyatt D, Chen GL, Locascio PF, Land ML, Larimer FW, Hauser LJ. Prodigal:  
1249 prokaryotic gene recognition and translation initiation site identification. *BMC*  
1250 *Bioinformatics* **11**, 119 (2010).  
1251  
1252 115. Bayliss SC, Thorpe HA, Coyle NM, Sheppard SK, Feil EJ. PIRATE: A fast and scalable  
1253 pangenomics toolbox for clustering diverged orthologues in bacteria. *GigaScience* **8**,  
1254 giz119 (2019).  
1255

- 1256 116. Kanehisa M, Sato Y, Morishima K. BlastKOALA and GhostKOALA: KEGG Tools for  
1257 Functional Characterization of Genome and Metagenome Sequences. *J. Mol. Biol.* **428**,  
1258 726-731 (2016).  
1259
- 1260 117. Kanehisa M, Sato Y. KEGG Mapper for inferring cellular functions from protein  
1261 sequences. *Prot. Sci.* **29**, 28-35 (2020).  
1262
- 1263 118. Sievers F, Higgins DG. Clustal Omega for making accurate alignments of many protein  
1264 sequences. *Prot. Sci.* **27**, 135-145 (2018).  
1265
- 1266 119. Price MN, Dehal PS, Arkin AP. FastTree 2--approximately maximum-likelihood trees for  
1267 large alignments. *PLoS one* **5**, e9490 (2010).  
1268
- 1269 120. Orf GS, Gisriel C, Redding KE. Evolution of photosynthetic reaction centers: insights  
1270 from the structure of the heliobacterial reaction center. *Photosyn. Res.* **138**, 11-37 (2018).  
1271
- 1272 121. Tsuji J, *et al.* Anoxygenic phototrophic Chloroflexota member uses a Type I reaction  
1273 center. *bioRxiv*, 2020.2007.2007.190934 (2020).  
1274
- 1275 122. Sadekar S, Raymond J, Blankenship RE. Conservation of distantly related membrane  
1276 proteins: photosynthetic reaction centers share a common structural core. *Mol. Biol. Evol.*  
1277 **23**, 2001-2007 (2006).  
1278
- 1279 123. Waterhouse A, *et al.* SWISS-MODEL: homology modelling of protein structures and  
1280 complexes. *Nucl. Acids Res.* **46**, W296-w303 (2018).  
1281
- 1282 124. Hohmann-Marriott MF, Blankenship RE. Evolution of photosynthesis. *Ann. Rev. Plant*  
1283 *Biol.* **62**, 515-548 (2011).  
1284
- 1285 125. Krauß N. Structure and function of cyanobacterial photosystem I. In: *Photosynthetic*  
1286 *Protein Complexes* (ed Fromme P). Wiley-Blackwell (2008).  
1287
- 1288 126. Allen JP, Williams JC. Reaction centers from purple bacteria. In: *Photosynthetic Protein*  
1289 *Complexes* (ed Fromme P). Wiley-Blackwell (2008).  
1290
- 1291 127. Krogh A, Larsson B, von Heijne G, Sonnhammer EL. Predicting transmembrane protein  
1292 topology with a hidden Markov model: application to complete genomes. *J. Mol. Biol.*  
1293 **305**, 567-580 (2001).  
1294
- 1295 128. Søndergaard D, Pedersen CN, Greening C. HydDB: A web tool for hydrogenase  
1296 classification and analysis. *Sci. Rep.* **6**, 34212 (2016).  
1297
- 1298 129. Chen IA, *et al.* IMG/M v.5.0: an integrated data management and comparative analysis  
1299 system for microbial genomes and microbiomes. *Nucl. Acids Res.* **47**, D666-d677 (2019).  
1300

- 1301 130. Mukherjee S, *et al.* Genomes OnLine database (GOLD) v.7: updates and new features.  
1302 *Nucl. Acids Res.* **47**, D649-d659 (2019).  
1303
- 1304 131. Kits KD, Klotz MG, Stein LY. Methane oxidation coupled to nitrate reduction under  
1305 hypoxia by the Gammaproteobacterium *Methylomonas denitrificans*, sp. nov. type strain  
1306 FJG1. *Environ. Microbiol.* **17**, 3219-3232 (2015).  
1307
- 1308 132. Tavormina PL, Orphan VJ, Kalyuzhnaya MG, Jetten MS, Klotz MG. A novel family of  
1309 functional operons encoding methane/ammonia monooxygenase-related proteins in  
1310 gammaproteobacterial methanotrophs. *Environ. Microbiol. Rep.* **3**, 91-100 (2011).  
1311
- 1312 133. Vorobev A, *et al.* Genomic and transcriptomic analyses of the facultative methanotroph  
1313 *Methylocystis* sp. strain SB2 grown on methane or ethanol. *Appl. Environ. Microbiol.* **80**,  
1314 3044-3052 (2014).  
1315  
1316
- 1317  
1318

**Figure 1**

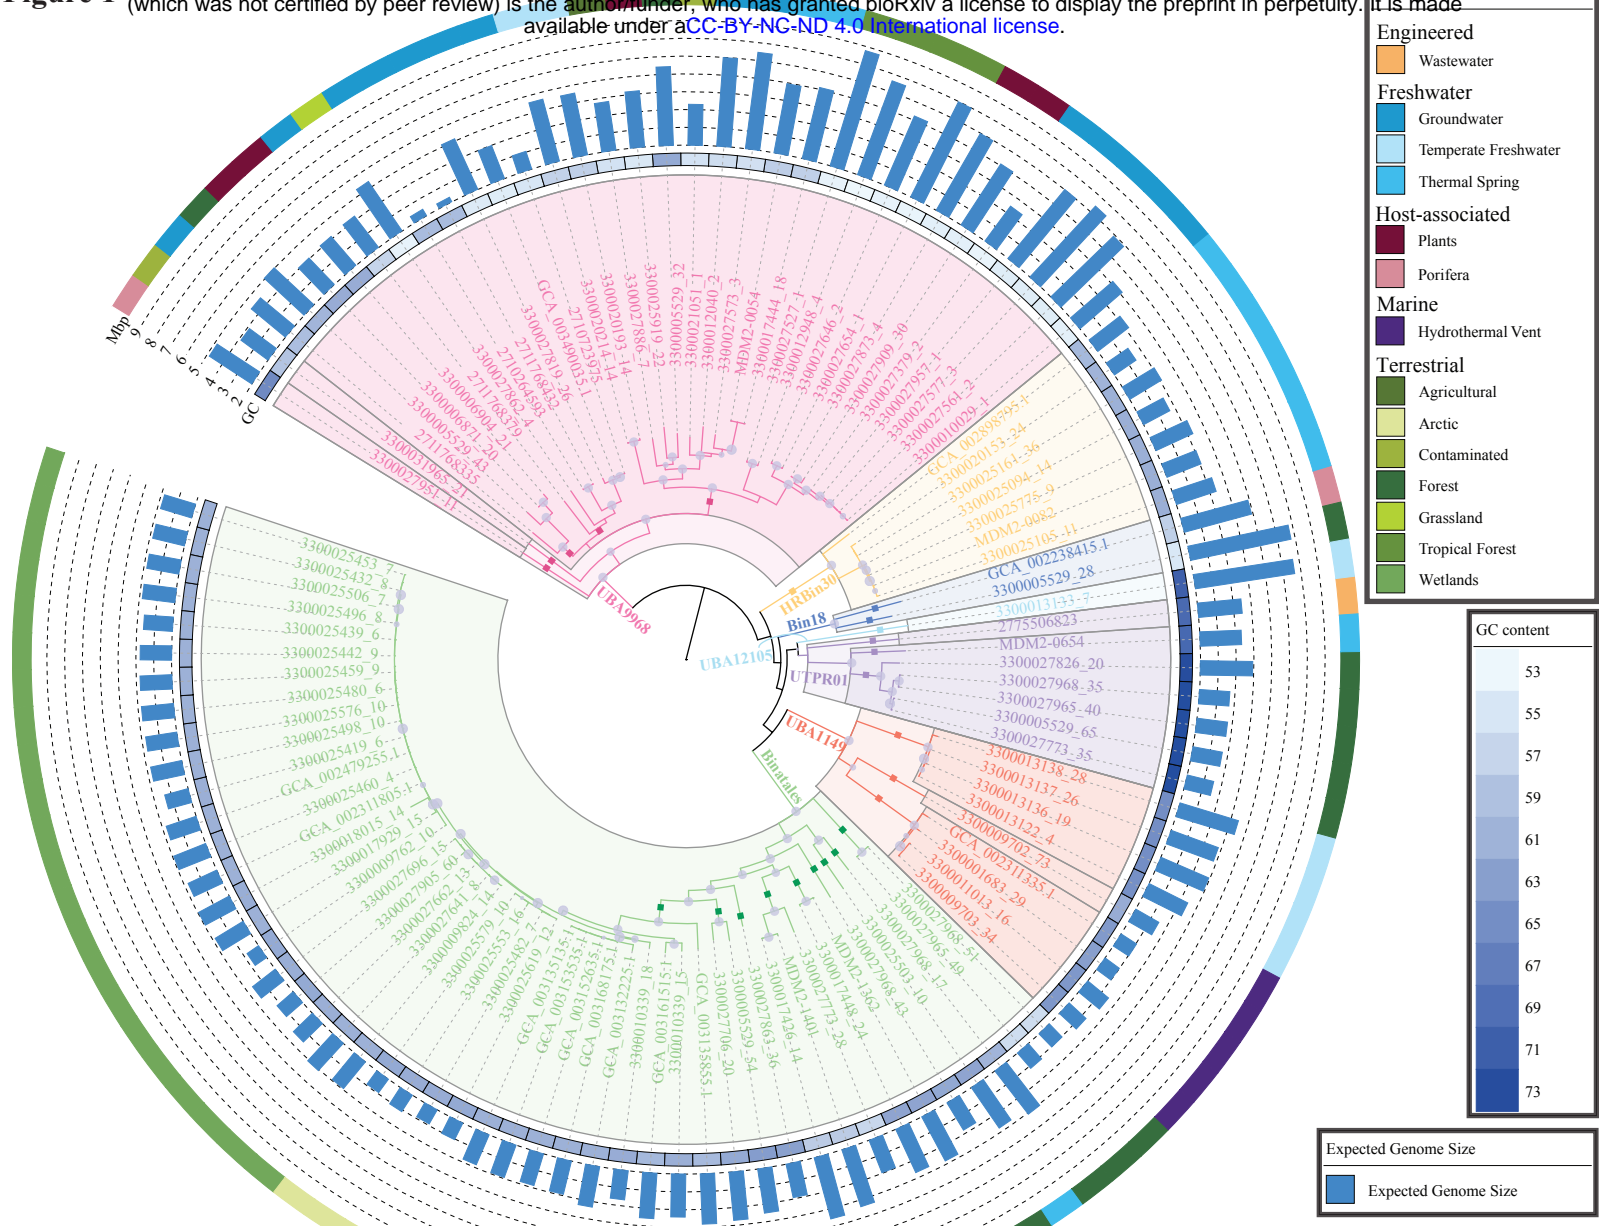

0.1  
I

Figure 2

**A. C1 metabolism in the Binatota**

|           | Methane oxidation |             |             |             | Methanol oxidation |             |             |             | Methylamine oxidation |             |             |             |             |             |             |             | Methylated sulfur compounds |             |             | Dichloromethane |             |             |            |             |
|-----------|-------------------|-------------|-------------|-------------|--------------------|-------------|-------------|-------------|-----------------------|-------------|-------------|-------------|-------------|-------------|-------------|-------------|-----------------------------|-------------|-------------|-----------------|-------------|-------------|------------|-------------|
|           | pMMO              |             |             |             |                    |             |             |             |                       |             |             |             |             |             |             |             | Dimethyl sulfone, DMS       |             |             |                 |             |             |            |             |
|           | <i>pmoA</i>       | <i>pmoB</i> | <i>pmoC</i> | <i>pmoD</i> | <i>xoxF</i>        | <i>xoxG</i> | <i>xoxH</i> | <i>mdh2</i> | <i>mno</i>            | <i>mauA</i> | <i>mauB</i> | <i>mauC</i> | <i>gmsA</i> | <i>gmsB</i> | <i>gmsC</i> | <i>mgdA</i> | <i>mgdB</i>                 | <i>mgdC</i> | <i>mgdD</i> |                 | <i>dmoA</i> | <i>synG</i> | <i>dso</i> | <i>ssuD</i> |
| Bin18     | 100               | 100         | 100         | 100         | 100                | 100         | 100         | 100         | 100                   | 100         | 100         | 100         | 100         | 100         | 100         | 100         | 100                         | 100         | 100         | 100             | 100         | 100         | 100        | 100         |
| Binatales | 100               | 100         | 100         | 100         | 100                | 100         | 100         | 100         | 100                   | 100         | 100         | 100         | 100         | 100         | 100         | 100         | 100                         | 100         | 100         | 100             | 100         | 100         | 100        | 100         |
| HRBin30   | 100               | 100         | 100         | 100         | 100                | 100         | 100         | 100         | 100                   | 100         | 100         | 100         | 100         | 100         | 100         | 100         | 100                         | 100         | 100         | 100             | 100         | 100         | 100        | 100         |
| UBA1149   | 100               | 100         | 100         | 100         | 100                | 100         | 100         | 100         | 100                   | 100         | 100         | 100         | 100         | 100         | 100         | 100         | 100                         | 100         | 100         | 100             | 100         | 100         | 100        | 100         |
| UBA12105  | 100               | 100         | 100         | 100         | 100                | 100         | 100         | 100         | 100                   | 100         | 100         | 100         | 100         | 100         | 100         | 100         | 100                         | 100         | 100         | 100             | 100         | 100         | 100        | 100         |
| UBA9968   | 100               | 100         | 100         | 100         | 100                | 100         | 100         | 100         | 100                   | 100         | 100         | 100         | 100         | 100         | 100         | 100         | 100                         | 100         | 100         | 100             | 100         | 100         | 100        | 100         |
| UTPR01    | 100               | 100         | 100         | 100         | 100                | 100         | 100         | 100         | 100                   | 100         | 100         | 100         | 100         | 100         | 100         | 100         | 100                         | 100         | 100         | 100             | 100         | 100         | 100        | 100         |

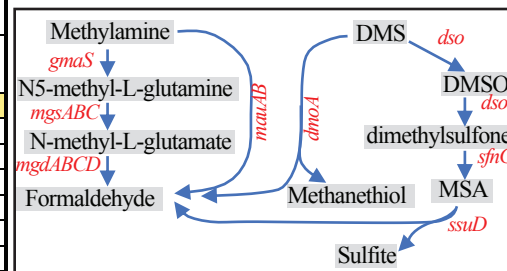

|           | Predicted capabilities |          |             |                 |     |     |     |
|-----------|------------------------|----------|-------------|-----------------|-----|-----|-----|
|           | Methane                | Methanol | Methylamine | Dimethylsulfone | DMS | MSA | DCM |
| Bin18     | 100                    | 100      | 100         | 100             | 100 | 100 | 100 |
| Binatales | 100                    | 100      | 100         | 100             | 100 | 100 | 100 |
| HRBin30   | 100                    | 100      | 100         | 100             | 100 | 100 | 100 |
| UBA1149   | 100                    | 100      | 100         | 100             | 100 | 100 | 100 |
| UBA12105  | 100                    | 100      | 100         | 100             | 100 | 100 | 100 |
| UBA9968   | 100                    | 100      | 100         | 100             | 100 | 100 | 100 |
| UTPR01    | 100                    | 100      | 100         | 100             | 100 | 100 | 100 |

**B. Methanol dehydrogenase**

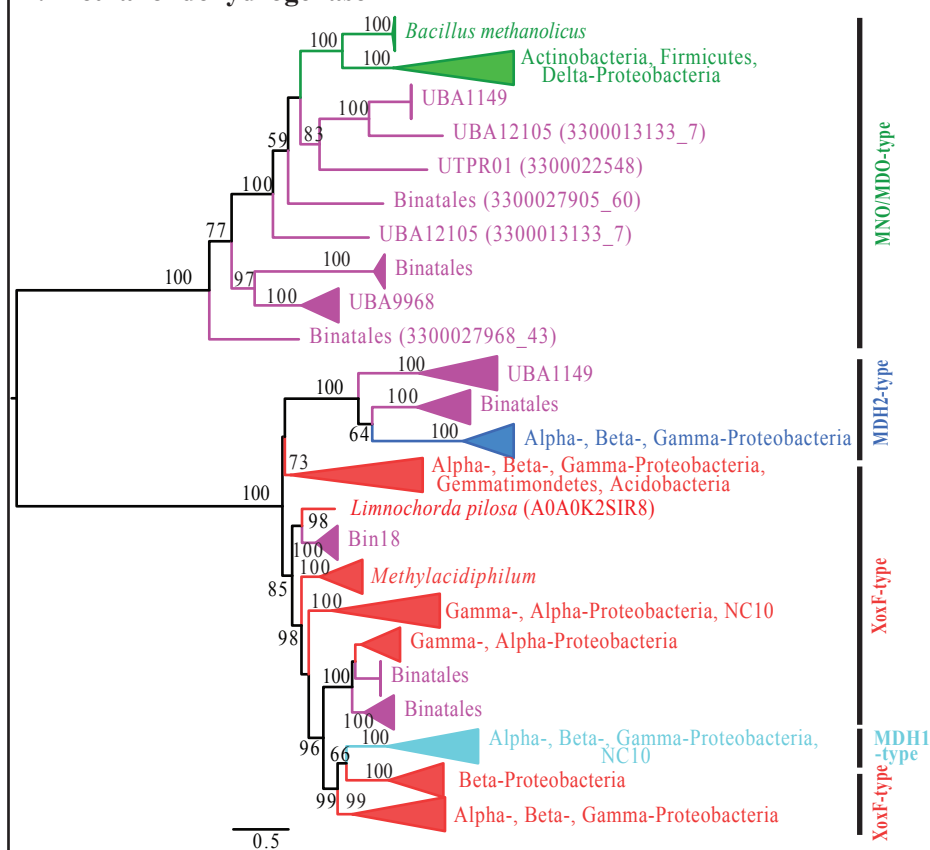

**C. pMMO genomic organization**

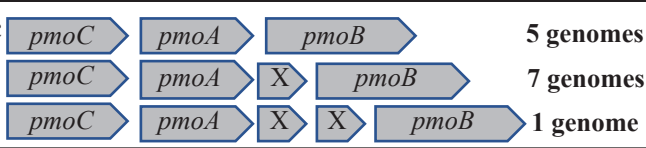

**D. Particulate methane monooxygenase subunit A**

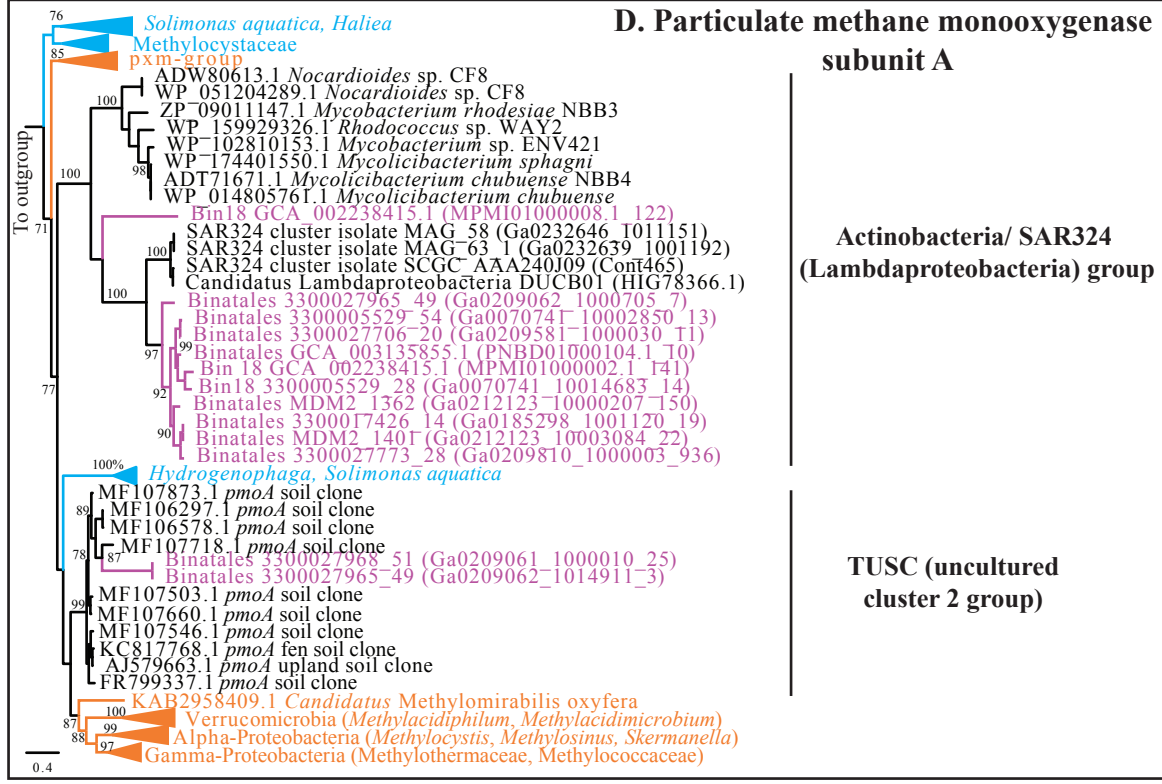

**E. Predicted Binatota PmoABC 3D structure**

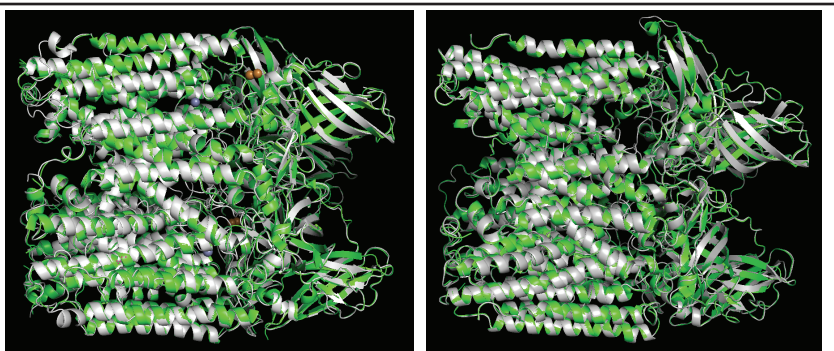









A

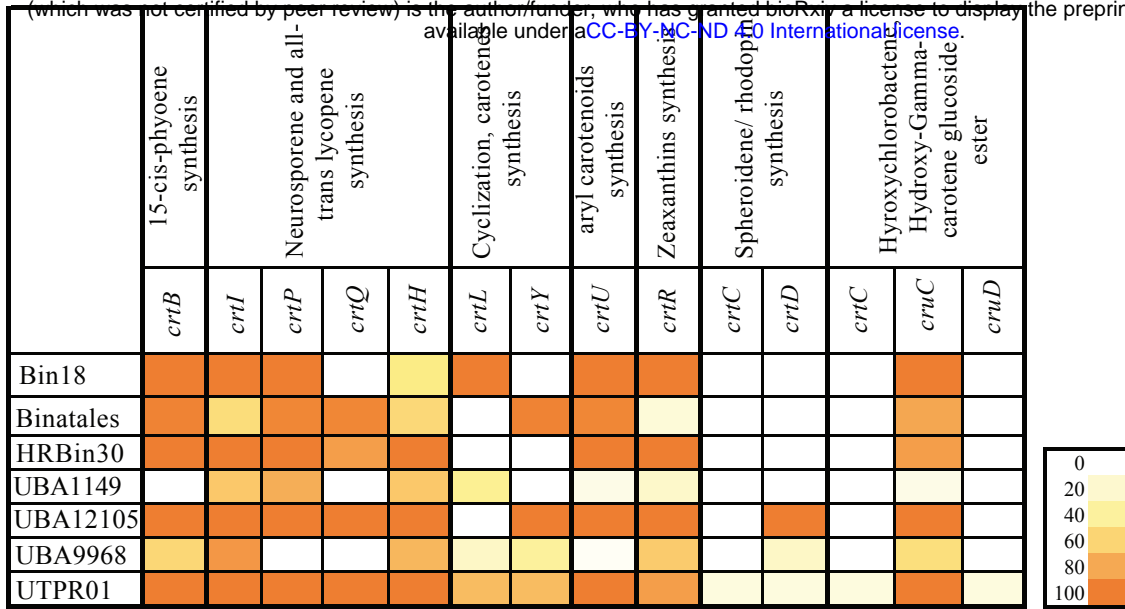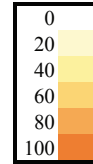

B

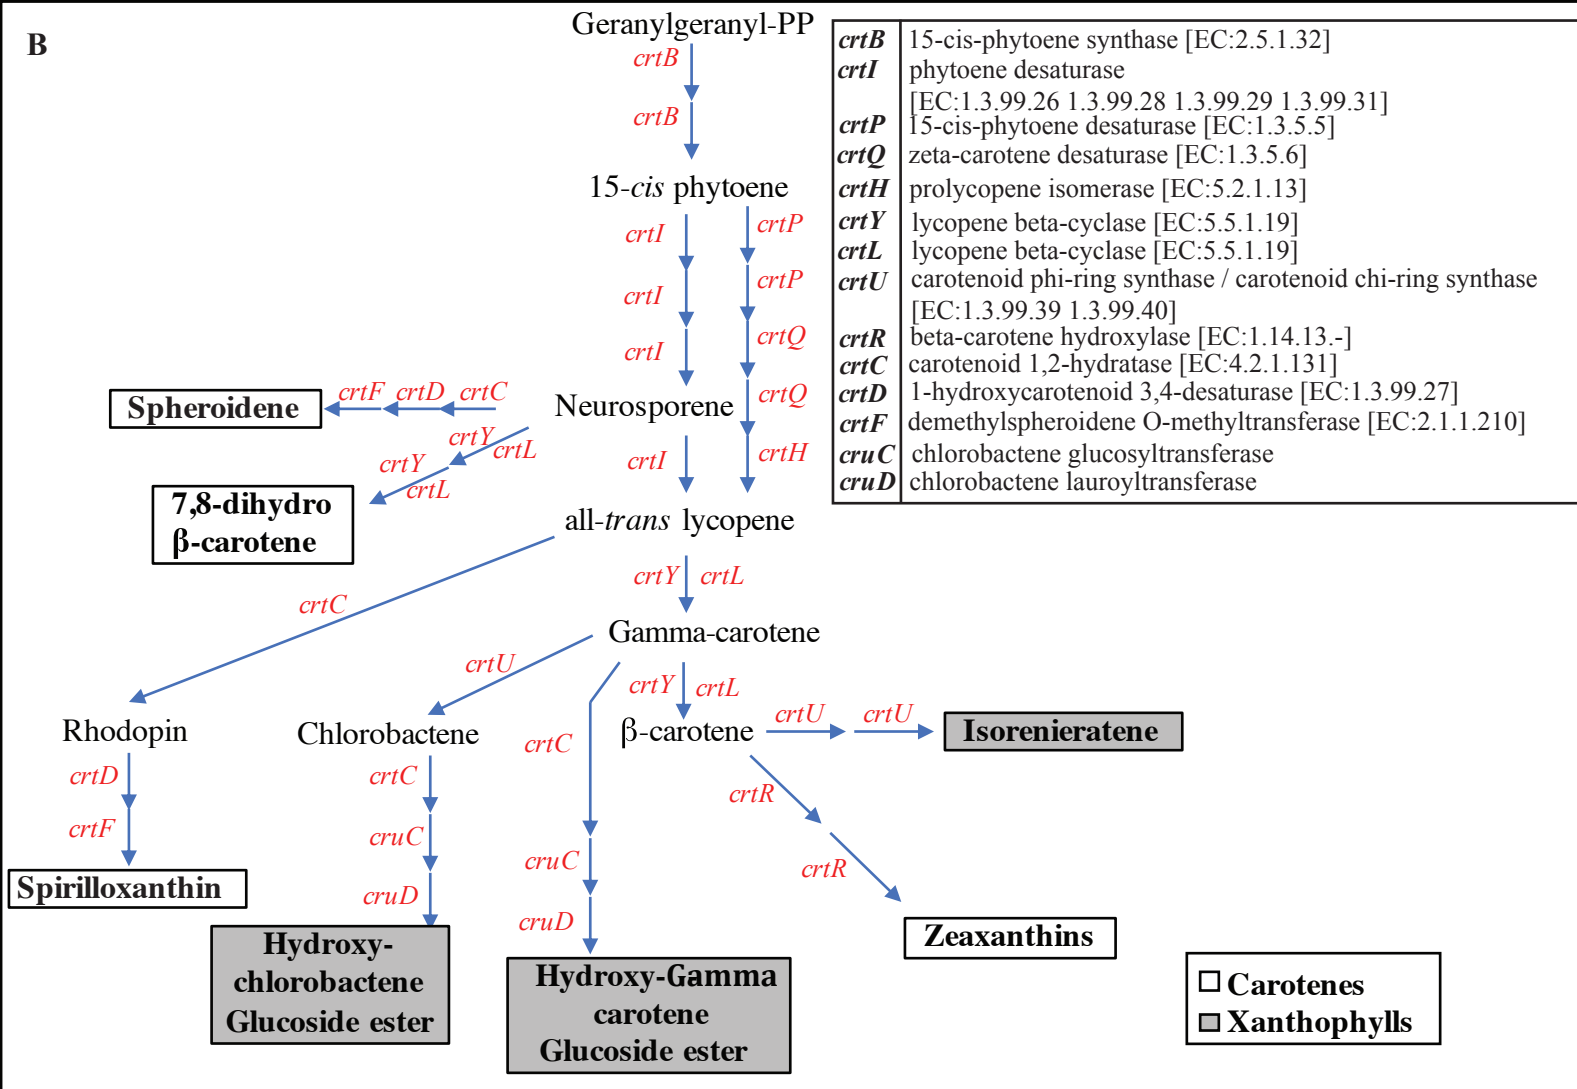

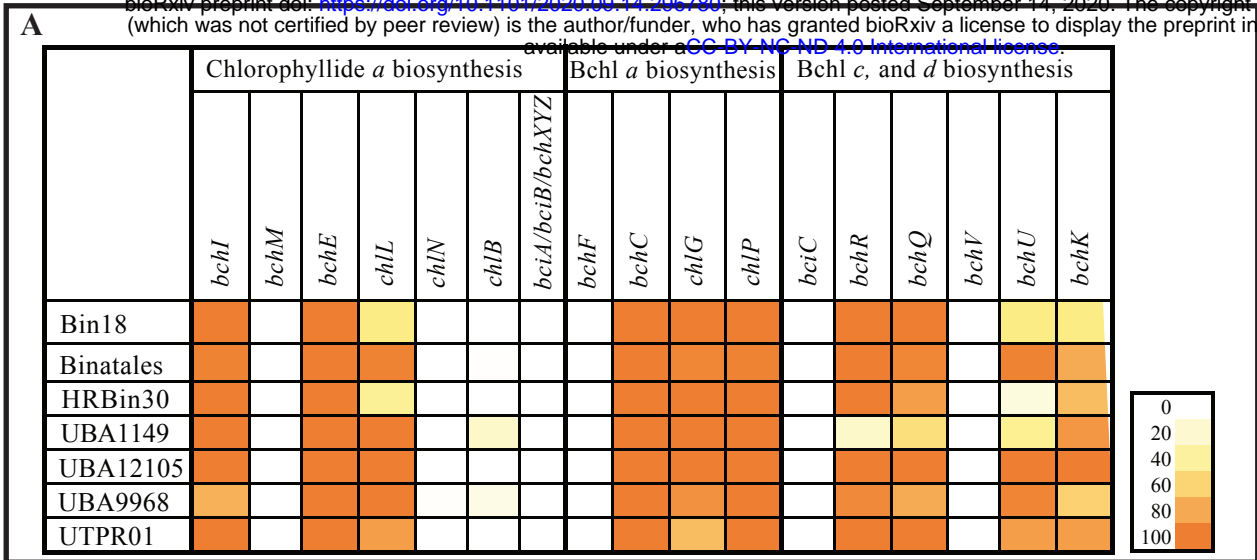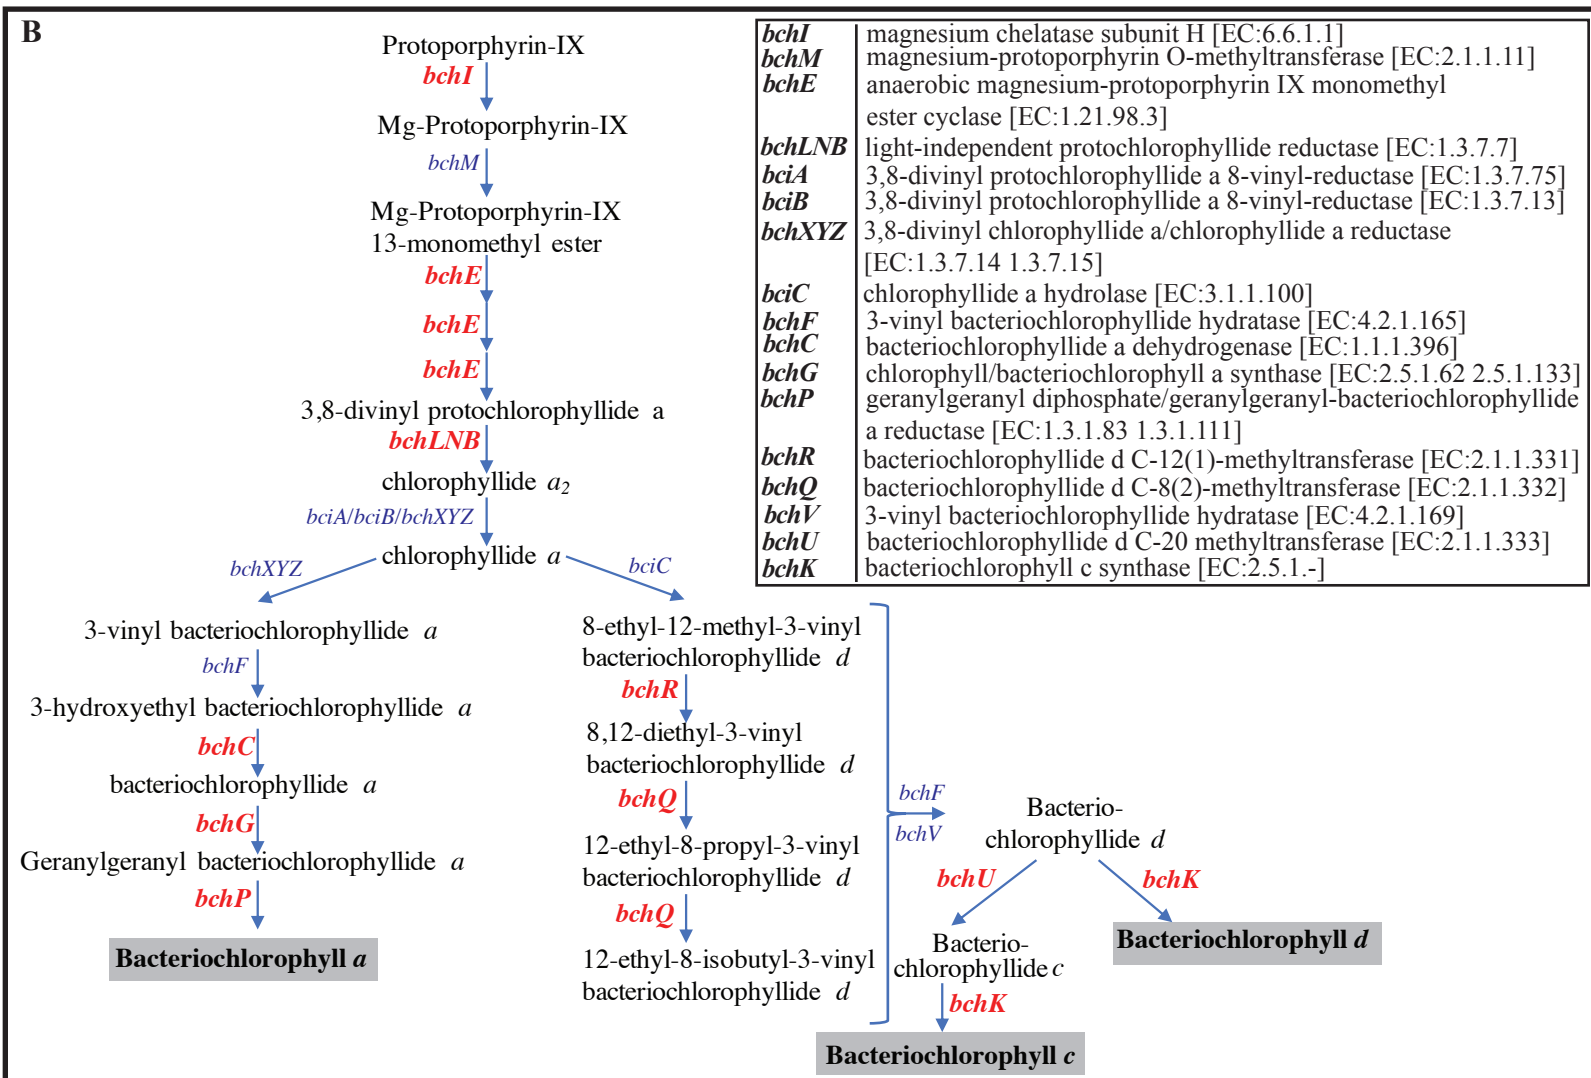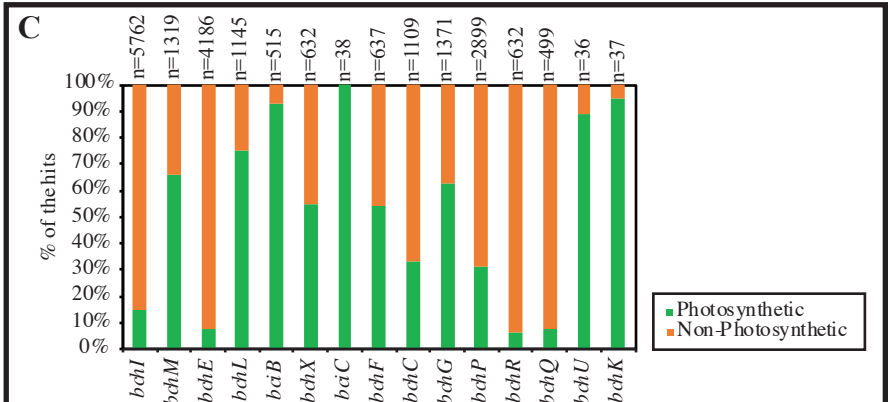

**Figure 8**

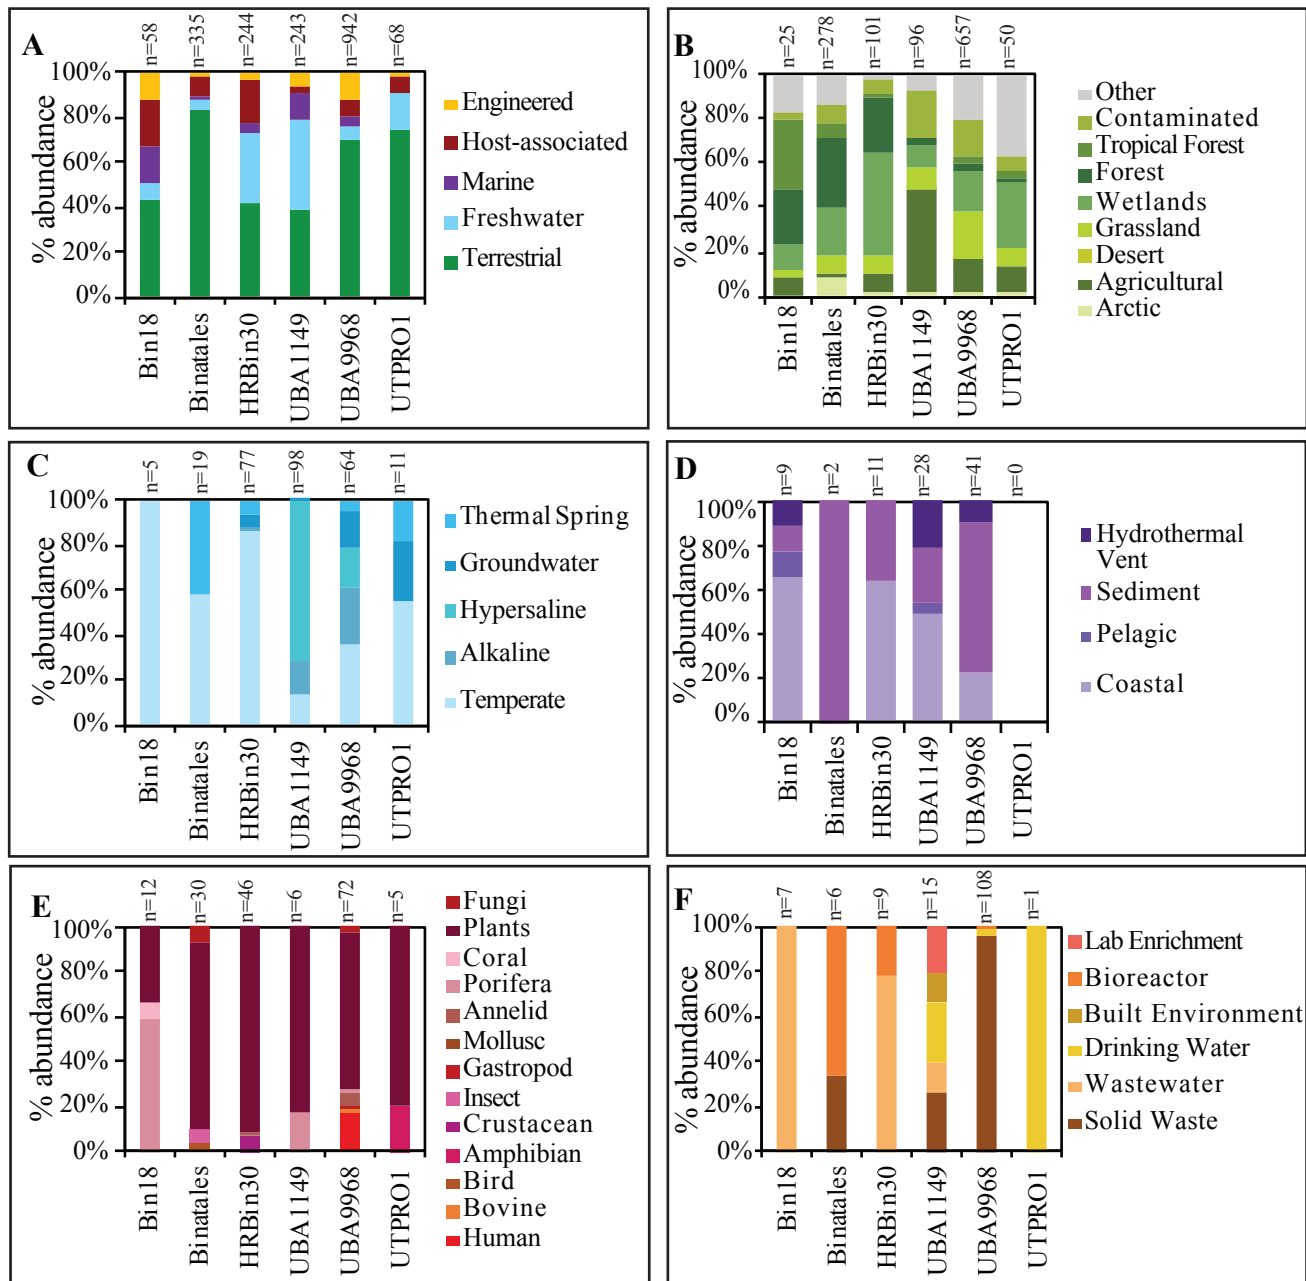

Figure 9

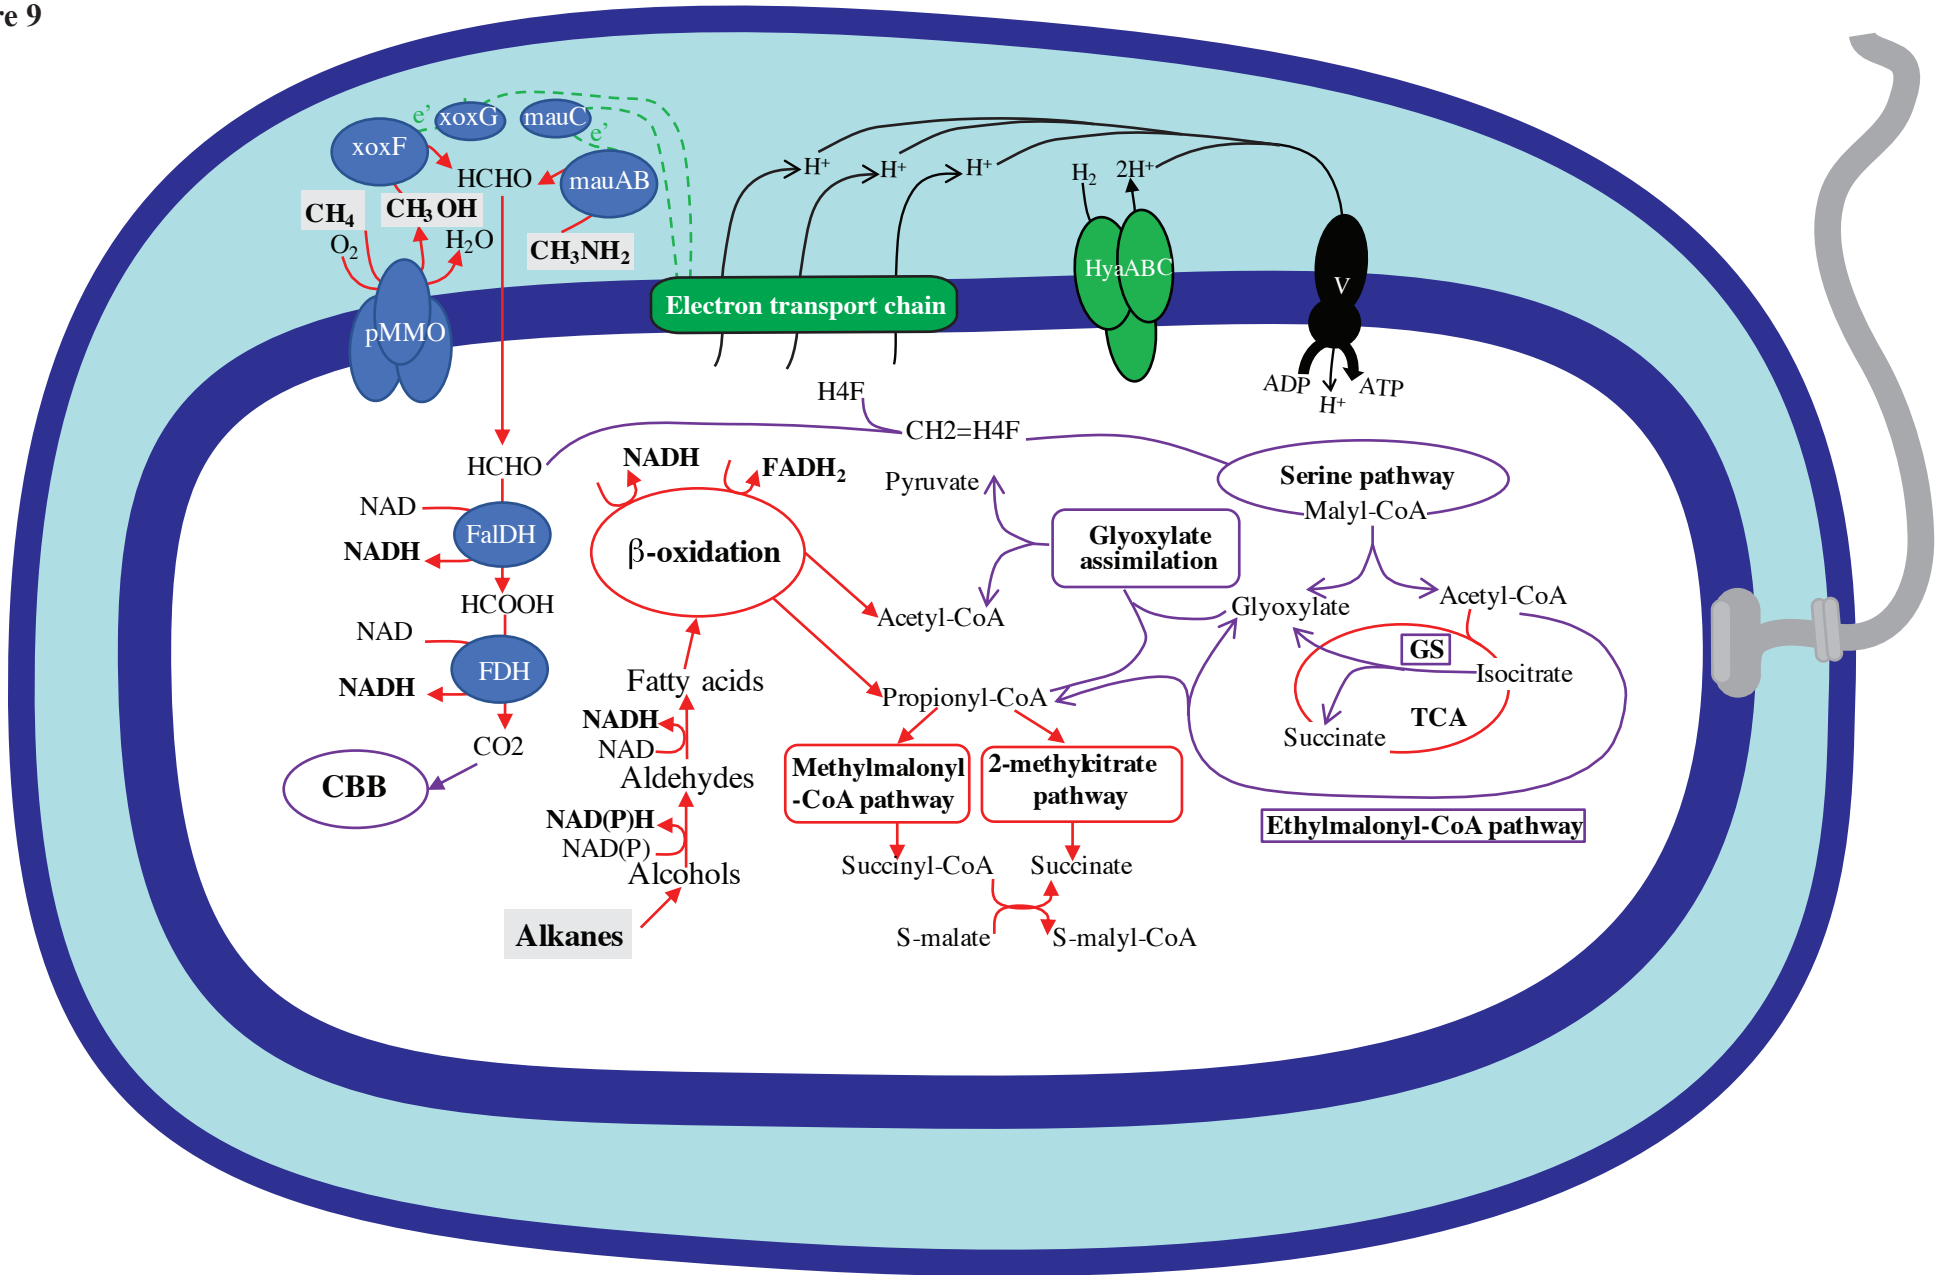

Source: https://www.biorxiv.org/content/10.1101/2020.09.14.296780v1.full.pdf
